1 WhiB6 is required for the secretion-dependent regulation of ESX-1 substrates in  
2 pathogenic mycobacteria.

3

4 Short title: Regulation of ESX-1 substrates by WhiB6 in pathogenic mycobacteria

5

6 Abdallah M. Abdallah<sup>1¶\*</sup>, E.M. Weerdenburg<sup>2¶</sup>, Qingtian Guan<sup>1</sup>, R. Ummels<sup>2</sup>, S. Borggreve<sup>2</sup>,  
7 S.A. Adroub<sup>1</sup>, Tareq B. Malas<sup>1</sup>, Raece Naeem<sup>1</sup>, Huoming Zhang<sup>3</sup>, T.D. Otto<sup>4</sup>, W. Bitter<sup>2\*&</sup> &  
8 A. Pain<sup>1\*&</sup>

9

10 <sup>1</sup>Pathogen Genomics Laboratory, BESE Division, King Abdullah University of Science and  
11 Technology (KAUST), Thuwal-Jeddah, Kingdom of Saudi Arabia;

12 <sup>2</sup>Department of Medical Microbiology and Infection Control, VU University Medical Center,  
13 Amsterdam, The Netherlands;

14 <sup>3</sup>Bioscience Core Laboratory, King Abdullah University of Science and Technology  
15 (KAUST), Thuwal-Jeddah, Kingdom of Saudi Arabia;

16 <sup>4</sup>Pathogen Genomics, The Wellcome Trust Sanger Institute, Hinxton, Cambridge, United  
17 Kingdom

18

19 <sup>¶</sup> Joint authors

20 <sup>&</sup> Joint authors

21 <sup>\*</sup>Corresponding authors

22 Abdallah M. Abdallah ([abdallah.abdallah@kaust.edu.sa](mailto:abdallah.abdallah@kaust.edu.sa))

23 Wilbert Bitter ([w.bitter@vumc.nl](mailto:w.bitter@vumc.nl))

24 Arnab Pain ([arnab.pain@kaust.edu.sa](mailto:arnab.pain@kaust.edu.sa))

25



## 27 **Abstract**

28           The mycobacterial type VII secretion system ESX-1 is responsible for the secretion of  
29 a number of proteins that play important roles during host infection. The regulation of the  
30 expression of secreted proteins is often essential to establish successful infection. Using  
31 transcriptome sequencing, we found that the abrogation of ESX-1 function in *Mycobacterium*  
32 *marinum* leads to a pronounced increase in gene expression levels of the *espA* operon during  
33 the infection of macrophages, suggesting an important role in ESX-1-mediated virulence  
34 during the early phase of infection. In addition, the disruption of ESX-1-mediated protein  
35 secretion also leads to a specific down-regulation of the ESX-1 substrates, but not of the  
36 structural components of this system, during growth in culture medium. This effect is  
37 observed in both *M. marinum* and *M. tuberculosis*. We established that down-regulation of  
38 ESX-1 substrates is the result of a regulatory process that is influenced by the putative  
39 transcriptional regulator *whib6*, which is located adjacent to the *esx-1* locus. In addition, the  
40 overexpression of the ESX-1-associated PE35/PPE68 protein pair resulted in a significantly  
41 increased secretion of the ESX-1 substrate EsxA, demonstrating a functional link between  
42 these proteins. Taken together, these data show that WhiB6 is required for the secretion-  
43 dependent regulation of ESX-1 substrates and that ESX-1 substrates are regulated  
44 independently from the structural components, both during infection and as a result of active  
45 secretion.

46

## 47 **Introduction**

48           Mycobacteria use several different type VII secretion systems (T7S) to transport  
49 proteins across their thick and waxy cell envelopes. One of these T7S systems, ESX-1, is  
50 responsible for the transport of a number of important virulence factors. Disruption of the

51 *esx-1* gene cluster severely reduces the virulence of *Mycobacterium tuberculosis* [1], whereas  
52 restoration of *esx-1* in the *Mycobacterium bovis*-derived vaccine strain BCG, which lacks part  
53 of the *esx-1* region due to continuous passaging, leads to increased virulence [2]. Many  
54 studies have attempted to elucidate the function of ESX-1 substrates in virulence. In the case  
55 of pathogenic mycobacteria, such as *M. tuberculosis* and the fish pathogen *Mycobacterium*  
56 *marinum*, ESX-1 is responsible for the translocation of the bacteria from the phagolysosomal  
57 compartments to the cytosols of macrophages [3,4]. This translocation activity has been  
58 attributed to the ability of the secreted protein EsxA (also called ESAT-6) to lyse membranes  
59 [5,6]. Interestingly, a closely related homologue of this protein is also secreted by non-  
60 pathogenic and non-translocating mycobacteria such as *Mycobacterium smegmatis*. A recent  
61 report indicated that, although the EsxA proteins of *M. smegmatis* and *M. tuberculosis* are  
62 highly homologous, the membrane lysis potentials of these proteins are different [7]. In *M.*  
63 *smegmatis*, ESX-1 is involved in a completely different process, *i.e.*, conjugative DNA  
64 transfer [8]. The proposed functions of ESX-1 in pathogenic mycobacterial species include  
65 host cell entry and intercellular spread [9].

66         The ESX-1 substrates identified to date are mostly encoded by genes of the *esx-1*  
67 locus, such as EsxA, EsxB, EspE and EspB. The exceptions are EspA and EspC [10,11],  
68 which are both part of the *espA* operon, which is located elsewhere in the genome; however,  
69 these genes are homologous to the *espE* and *espF* genes, respectively, which belong to the  
70 *esx-1* locus . A peculiar characteristic of ESX-1 substrates is that these substrates are  
71 mutually dependent, *i.e.*, the secretion of each of these substrates is dependent on the  
72 secretion of the other substrates [10]. The secreted ESX proteins contain a conserved WxG  
73 amino acid motif located between two  $\alpha$ -helices [12]. Recently, an additional conserved  
74 secretion signal, present in all secreted protein pairs, was identified. This C-terminal  
75 YxxxD/E motif can target proteins for secretion, but does not determine the specificity for a

76 particular type VII system [13]. Therefore, it remains difficult to bioinformatically predict  
77 novel ESX-1 substrates.

78 To establish successful infection, mycobacteria need regulatory mechanisms to  
79 express the right proteins at the right time. In different environments, mycobacteria require  
80 specific transcriptional responses to successfully respond to the stress conditions  
81 encountered. During the first stages of infection, ESX-1-mediated protein secretion is one of  
82 the most important virulence mechanisms of pathogenic mycobacteria [4,9,10,14,15].  
83 Consequently, the tight transcriptional regulation of *esx-1* and the associated genes is  
84 required. The transcriptional regulator PhoP of the two-component system PhoPR positively  
85 regulates the transcription of many *esx-1*-associated genes, including genes in the *espA*  
86 operon [16,17]. It has been proposed that PhoP regulation is dependent on environmental pH  
87 [18], which could indicate that the acidic environment of the phagosome induces *esx-1* gene  
88 transcription via PhoP, leading to bacterial escape from this compartment. Other studies have  
89 shown that the *espA* operon is, in addition to PhoP, also regulated by the transcription factors  
90 EspR and MprAB and the repressors CRP and Lsr2, indicating that tight regulation of this  
91 operon is essential and, furthermore, suggesting that the *espA* operon may be regulated in a  
92 manner distinct from the regulation of other ESX-1 substrates [19-22].

93 Since ESX-1 is crucial for virulence, inactivation of this secretion system would be  
94 expected to have a large impact on gene regulation processes in mycobacteria. Here, we  
95 apply RNA-seq and quantitative proteomics to determine the gene expression and proteomic  
96 profiles of the pathogenic mycobacteria *M. marinum* and *M. tuberculosis* in the absence of a  
97 functional ESX-1 secretion system. During short-term infection of macrophages, we observed  
98 highly increased transcript levels of the *espA* operon. In contrast, during in vitro growth in  
99 culture medium, transcription of most ESX-1 substrates and some putative new substrates  
100 was seen to be decreased. Based on these gene transcription levels, we confirmed a regulatory

101 role for the putative transcriptional regulator WhiB6 in the gene expression of ESX-1  
102 substrates.

103

## 104 **Results**

105

### 106 **Global features of the *M. marinum* *esx-1* mutant transcriptome** 107 **and proteome**

108 To investigate the effect of ESX-1 disruption on gene expression and protein  
109 production, RNA and protein were extracted from three independent exponential phase  
110 cultures of the *M. marinum* E11 strain and the isogenic *esx-1*-mutant during growth in 7H9  
111 culture medium to characterize the transcriptome and proteome. Using transcriptomics  
112 (RNA-seq) and mass spectrometry (MS)-based proteomics with isobaric labelling for  
113 quantification, we captured the expression dynamics of the transcripts and proteomes of the  
114 *esx-1* mutant. Data quality was assessed using Euclidean distance matrices for RNA (Figure  
115 S1) and principal component analysis (PCA) for protein (Figure S2), which demonstrated  
116 high levels of reproducibility between biological replicates. After filtering (see Materials and  
117 Methods for details), a total of 823 genes were identified as being differentially expressed  
118 (DE) as messenger RNA, of which 525 were classified as down-regulated and 298 as up-  
119 regulated (Figure 1A, Table S1). To determine parallel changes in protein levels, 1,657  
120 proteins were identified by the presence of 2 or more peptides, of which 576 proteins passed  
121 our filter and we classified them as DE. Of these, 412 proteins were found to be down-  
122 regulated and 164 were up-regulated (Table S2), and 482 protein-coding genes were shared  
123 and were identified in both the RNA-seq and quantitative proteomic datasets (Figure 1C).

124

125 **Fig 1. Global Features of the Transcriptomes and Proteomes of the *M. marinum* and *M.***  
126 ***tuberculosis* Esx-1 Mutant Strains.**

127 Volcano plots obtained from RNA-seq analysis of the wild-type *M. marinum* E11 strain vs.  
128 the *eccCb<sub>1</sub>* transposon mutant (A) and of *M. tuberculosis* mc<sup>2</sup>6020 vs. the ESX-1 mutant  
129 strain (B). Each dot indicates the expression value of a gene. Red dots indicate statistical  
130 significance ( $q < 0.05$ ), and black dots indicate a lack of statistical significance. Selected  
131 genes that are most down- or up-regulated in the *ESX-1* mutant strains are highlighted. (C)  
132 Venn diagram of the number of differentially expressed transcripts and proteins quantified  
133 using RNA-seq and quantitative proteomics, respectively. Scatterplots of the relationship  
134 between differentially expressed genes of *M. marinum* *eccCb<sub>1</sub>* transposon mutant and those  
135 of the isogenic wild-type strain E11, quantified in both data sets and classified into the  
136 following categories: (D) lipid metabolism, (E) regulatory proteins and (F) cell wall and cell  
137 process. Scatterplots and bar chart show the rectilinear equation and the Pearson correlation  
138 coefficient ( $R^2$ ).

139

140 The degree of global correlation between the gene expression and protein abundance  
141 scores among the shared genes was relatively low (Figure S3A), which has also been noted in  
142 other bacterial studies [23]. However, within certain classes of *M. marinum* functional  
143 categories (<http://mycobrowser.epfl.ch/marinolist.html>), the degree of correlation was much  
144 higher than that in other classes, with  $R^2$  exceeding 0.8 for the categories such as lipid  
145 metabolism (Figure 1D), regulation (Figure 1E) and cell wall and cell processes (Figure 1F).  
146 Of the DE genes at the RNA and protein levels, 28% were in the intermediary metabolism  
147 and respiration category, 18% were in the cell wall and cell process category, 15% were in  
148 the information pathways category and 14% were in the lipid metabolism category (Figure  
149 S4).

150           Transcriptional profiling analysis of the double auxotrophic *M. tuberculosis* mc<sup>2</sup>6020  
151 mutant strains [24] and their isogenic *esx-1* mutants during growth was carried out to identify  
152 genes for which expression was dependent on ESX-1 disruption (Figure 1B, Table S3). For  
153 this species, the same trends could be identified as for *M. marinum*.

154

## 155 **Major effects of ESX1 mutation on genes encoding ESX-1**

### 156 **substrates and biosynthetic pathways**

157           Analysis of differential expression in *M. marinum* identified changes in genes  
158 involved in a variety of cellular processes (Figure 2), although a majority of the most  
159 differentially regulated genes were associated with cell wall and cell processes and lipid  
160 metabolism. We noted that a substantial number of *esx-1*-associated genes were down-  
161 regulated in the mutant strains during growth in culture medium, including 11 genes that  
162 were located within or directly adjacent to the *esx-1* gene cluster. Among these down-  
163 regulated genes were those coding for known ESX-1 substrates, such as EsxA, EsxB, EspE  
164 and EspB. Remarkably, mRNA levels of core components of the ESX-1 secretion system,  
165 *i.e.*, those encoding members of the type VII secretion complex, such as EccB<sub>1</sub>, EccD<sub>1</sub>, EccE<sub>1</sub>  
166 and MycP<sub>1</sub>, remained unchanged, even though the corresponding genes are interspersed with  
167 genes encoding ESX-1 substrates. In contrast to the mRNA levels, we noted a strong increase  
168 in the protein levels of EsxA and EsxB, probably reflecting the accumulation of these  
169 proteins in the cell due to the secretion defect (Figure 2). Our data also indicate a significant  
170 effect of *esx-1* disruption on genes associated with lipid metabolism (Figure 2), including  
171 genes associated with the synthesis of mycolic acids. Strong down-regulation was observed at  
172 the mRNA and protein levels for several polyketide synthases, including genes involved in  
173 phthiocerol dimycocerosate synthesis and mycolic acid biosynthesis, such as *umaA*, *mmaA3*,  
174 *accD5*, *accD6*, and *pks15/1*, which encode components of the lipid biosynthesis pathway



175 (Figure 2, Table S1, S2). The changes observed in *esx-1* and lipid-metabolism-associated  
176 genes at the mRNA and protein levels were not unexpected; it has been reported previously  
177 that ESX-1-dependent protein secretion and mycolic acid synthesis are critically linked [25].  
178 However, we also noted a surprisingly broad impact of ESX-1 mutation on major  
179 biosynthetic pathways, including ribosomal protein synthesis and DNA biosynthesis (Table  
180 S1, S2). Down-regulation was observed at the mRNA and protein levels for several genes  
181 encoding ribosomal proteins and DNA gyrase and a ribonucleotide-diphosphate reductase,  
182 which are components of protein and DNA biosynthesis, respectively. We also identified  
183 changes at both the mRNA and protein levels in genes involved in general stress response  
184 (*grpE*, *dnaK*, *groES*, *groEL1*), genes involved in stress response regulation (*sigA*, *sigB*, *devS*),  
185 members of the WhiB family (*whiB2*, *whiB4*, *whiB6*) and several PE\_PGRS genes (Figure 2).  
186 A similar trend was observed for *M. tuberculosis* (Figure 2). In fact, of all the genes, the *esx-*  
187 *1* genes encoding the substrates EsxA, EsxB and EspK were the most significantly down-  
188 regulated in the mutant strain (Figure 2, Table S3). However, in contrast to the levels in the  
189 *M. marinum* mutant, the gene expression levels of *eccB<sub>1</sub>* and *eccD<sub>1</sub>* were also somewhat  
190 decreased in the *M. tuberculosis* mutant (Figure 2). On the other hand, the *M. tuberculosis*  
191 *esx-1* mutation did not seem to have a significant effect on the expression of genes involved  
192 in lipid metabolism compared to the effect seen in *M. marinum* (Figure 2, Table S1, S3).  
193 Finally, a significant number of genes that are associated with information pathways,  
194 including genes encoding ribosomal proteins, were up-regulated at the mRNA level in the  
195 *esx-1* mutant (Figure 2). Taken together, the observed changes in the transcriptome and  
196 proteome of the *esx-1* mutant reflect the role of the *esx-1* cluster employed by mycobacteria  
197 for major biochemical pathways.

198

199 **Fig 2. Top Differentially Expressed Genes of *M. marinum* and *M. tuberculosis*, when**  
200 **Grown in Culture Medium, Grouped into Broad Functional Categories.**

201 Within each group, genes are ranked in ascending order by *p*-value. (Red) Top 100 annotated  
202 *M. marinum* E11 genes that exhibit greatest differential expression in the *M. marinum eccCb<sub>1</sub>*  
203 transposon mutant compared to the isogenic wild-type strain E11 during growth in 7H9  
204 culture medium. Bar chart of log<sub>2</sub>-fold change for individual genes (RNA, blue; protein, red;  
205 locus tags, outer). (Green) Top 100 annotated *M. tuberculosis* genes that exhibit greatest  
206 differential expression in the auxotrophic *M. tuberculosis* RD1 deletion mutant strain  
207 mc<sup>2</sup>6030 compared to the isogenic control strain mc<sup>2</sup>6020 during growth in 7H9 culture  
208 medium. Bar chart of log<sub>2</sub>-fold change for individual genes. The genes Rv3872-Rv3878 are  
209 not included as these genes are deleted in the RD1 mutant strain.

210

211 **Global transcriptional profiling of intraphagosomal *M. marinum***  
212 **and the *esx-1* mutant**

213 We next determined the effect of ESX-1 abrogation in *M. marinum* on gene  
214 transcription during infection of primary macrophages. Using a PMA-differentiated THP-1  
215 cell line as a model of primary macrophages, we analysed the global gene expression of the  
216 wild-type and *esx-1* mutant strains of *M. marinum* after 6 hours of infection. Wild-type  
217 mycobacteria can escape the phagosome within two hours after infection, whereas *esx-1*  
218 mutants are known to be limited to the phagosomal compartment. The intraphagosomal  
219 transcriptome of the *esx-1* mutant was compared with the intracellular transcriptome of wild-  
220 type *M. marinum*. Furthermore, these intracellular transcriptomes were also compared with  
221 the transcriptome of wild-type *M. marinum* grown in standard broth culture. We identified  
222 720 (*p*<0.05) genes in the *esx-1* mutant that exhibited significant changes in expression after  
223 THP-1 infection compared to the expression levels in the wild-type strain. Of these genes,

224 465 were down-regulated and 255 were up-regulated (Table S4, Figure S5). Remarkably,  
225 none of the genes within the *esx-1* region were significantly differentially expressed in the  
226 *esx-1*-mutant compared to the wild-type strain. However, we found a specific and pronounced  
227 increase in the transcript levels of the *espA* operon in the intraphagosomal transcriptome of  
228 the *esx-1* mutant compared with the levels in the in vitro transcriptomes (Figure 3A). During  
229 growth in culture medium, the mRNA levels of *espA* did not differ between the wild-type and  
230 *esx-1*-deficient *M. marinum* strains, which was confirmed by quantitative RT-PCR (qRT-  
231 PCR) (Figure 3B). Therefore, these data suggest that proteins encoded by the *espA* operon,  
232 *i.e.*, EspA, EspC and EspD, play an important role in ESX-1-specific processes during the  
233 first stages of macrophage infection. The *espA* operon was also induced in the wild-type  
234 bacteria inside macrophages, albeit at a lower level. Perhaps this difference exists because the  
235 wild-type bacteria are able to escape from the phagosome, whereas the *esx-1* mutants are not.  
236

237 **Fig 3. Effect of ESX-1 Disruption (*eccCb<sub>1</sub>* Transposon Mutant) on Gene Transcription**  
238 **During Infection (Indicated as *int'*) and Growth in Culture Medium in *M. marinum***  
239 **Compared to that in the Wild-Type Strain E11 during Growth in 7H9 Culture Medium.**

240 (A) Relative transcript expression levels of the ESX-1 secretion system-associated genes,  
241 including the main ESX-1 locus as well as the EspR regulator and accessory factors in the  
242 EspA operon, which is encoded outside the RD-1 region. (B) Gene expression levels, as  
243 measured by qRT-PCR, were compared to those of the wild-type strain E11 grown in similar  
244 conditions. Values represent mean  $\pm$  standard error of the mean of two biological replicates.  
245 (C, D) Regulation of genes associated with cell wall synthesis, including genes involved in  
246 mycolic acid synthesis (C) and PDIMs (D).

247

248 Further analysis showed that a significant number of genes that code for proteins  
249 involved in cell wall and cell processes were differentially regulated by intracellular wild-  
250 type *M. marinum* and the ESX-1-deficient strain in comparison with their counterparts grown  
251 in culture medium (Table S5, S6). *M. marinum* genes involved in mycolic acid synthesis,  
252 phthiocerol dimycocerosate (PDIM) synthesis and transport to the cell surface, such as  
253 *fabG1*, *accDs*, *ppsC*, *ppsD*, *pks11\_1*, *pks13*, as well as genes coding for polyketide synthases  
254 and the mycolic acid methyltransferase *umaA* were differentially expressed during infection  
255 of THP-1 cells (Figure 3C, D). Furthermore, *cpsY*, a gene that encodes UDP-glucose 4-  
256 epimerases and is essential for linking peptidoglycans and mycolic acid [26], exhibited a  
257 pronounced increase in mRNA level in the intracellular *esx-1* mutant (Table S4, S5, S6, S7).  
258 We also found that many genes associated with cell division and peptidoglycan assembly,  
259 such as *ftsE*, *ftsH*, *ftsW*, *murC*, and *murG* [27,28], were down-regulated by intracellular  
260 bacteria (Table S4, S5, S6, S7).

261 A significant number of genes that code for proteins associated with lipid metabolism  
262 and metabolic adaptation were differentially regulated in macrophages (Figure S6A). This  
263 subset includes genes involved in fatty acid metabolism such as isocitrate lyase (*icl*), an  
264 enzyme necessary for the glyoxylate cycle and required for intracellular survival [29,30], and  
265 *pckA*, which encodes the phosphoenolpyruvate carboxykinase and is essential for  
266 mycobacterial survival in both macrophages and mice [31,32] and is involved in energy  
267 metabolism (Figure S6B), and the KstR-dependent cholesterol regulon (Figure S6C), which  
268 is involved in lipid degradation and carbon metabolism [33]. We also observed significant  
269 effects of a number of genes involved in general stress response (*groES*, *groEL1*, *hsp*, *ahp*,  
270 *dnaK*), genes involved in stress response regulation (*sigB*, *devR*, *devS*, *hspR*, *kstR*), members  
271 of the WhiB family (*whiB2*, *whiB3*, *whiB4*, *whiB*, *whiB6*, *whiB7*) and alternative sigma  
272 factors (*sigE*, *sigL*, *sigM*) in the *esx-1* mutant during infection to macrophages. This pattern is

273 illustrated in Figure S6D and is probably associated with stressful intraphagosomal  
274 conditions.

275

## 276 **Different *M. marinum* *esx-1* transposon mutants have similar** 277 **gene transcription profiles**

278 The ESX-1-deficient strain of *M. marinum* used for RNA sequencing contains a  
279 transposon in the *eccCb<sub>1</sub>* gene. To confirm that the observed gene transcription effects were  
280 due to a defective ESX-1 system and not due to a side effect of this particular mutation, we  
281 analysed several mutants containing transposon insertions in different genes from the *esx-1*  
282 gene cluster and compared the mRNA levels of the selected genes by qRT-PCR. Our results  
283 showed decreased transcript levels of the known ESX-1 substrate *esxA* and other *esx-1*  
284 secretion-associated (*esp*) genes, namely, *espL*, *espK* and *espJ*, for all tested *esx-1* mutants,  
285 whereas the transcript levels of *eccD<sub>1</sub>*, which encodes a structural component of the ESX-1  
286 system, did not differ from the transcript levels in wild-type *M. marinum* (Figure 4). These  
287 gene expression patterns in the *eccB<sub>1</sub>*, *eccCa<sub>1</sub>*, *eccD<sub>1</sub>* and *eccE<sub>1</sub>* transposon mutants were  
288 similar to the RNA sequencing results obtained for the *eccCb<sub>1</sub>* mutant. The only exception  
289 was that for the mutant containing a transposon insertion in *eccD<sub>1</sub>*, we observed an increase  
290 of *eccD<sub>1</sub>* transcription itself and, to a lesser extent, of the adjacent gene *espJ* (Figure 4).  
291 However, this increase was most likely due to the presence of a strong promoter on the  
292 transposon, driving the transcription of the kanamycin resistance cassette, as the measured  
293 mRNA is transcribed from sequences directly downstream of this promoter. Altogether, our  
294 results demonstrate that inactivation of the ESX-1 secretion system leads to down-regulation  
295 of the transcription of ESX-1 substrates and associated proteins.

296

297 **Fig 4. *Esx-1* Transposon Mutants have Similar Gene Transcription Profiles.**

298 Gene expression levels for *M. marinum* *eccB*<sub>1</sub>, *eccCa*<sub>1</sub>, *eccCb*<sub>1</sub>, *eccD*<sub>1</sub> and *eccE*<sub>1</sub> transposon  
299 mutants as measured by qRT-PCR. All strains were grown in 7H9 culture medium, and gene  
300 expression levels were compared to those of the wild-type strain E11. Values represent mean  
301  $\pm$  standard error of the mean of at least three biological replicates.

302

303

## 304 **ESX-1 substrate gene transcription is reduced by a regulatory** 305 **mechanism**

306 We next sought to determine the molecular mechanism underlying the down-  
307 regulation of specific transcripts in *esx-1* mutant strains of *M. marinum*. It is possible that the  
308 decrease in mRNA levels is due to a regulatory effect at the transcriptional level.  
309 Alternatively, mRNA derived from specific sequences may be degraded via a post-  
310 transcriptional mechanism. To investigate these possibilities, we expressed an extra copy of  
311 the *espL* gene under the control of a constitutively active promoter in the wild-type and  
312 *eccCb*<sub>1</sub> mutant strains of *M. marinum* and determined the *espL* gene transcript levels. We  
313 found a similar increase in *espL* transcripts in both the wild-type and *eccCb*<sub>1</sub> mutant strains,  
314 indicating that degradation of specific mRNA is probably not the cause of the decreased  
315 mRNA levels in the mutant strain (Figure 5A). Expression levels of the downstream gene  
316 *espK* were not affected by the introduction of *espL*. These results indicate that there is a  
317 regulatory mechanism that prevents the transcription of genes encoding ESX-1 substrates and  
318 associated proteins in the absence of a functionally active ESX-1.

319

### 320 **Fig 5. Regulation of the ESX-1 Secretion System.**

321 (A) Down-regulation of *espL* is the result of a regulatory process. A functional copy of *espL*  
322 was introduced into wild-type and *eccCb*<sub>1</sub> mutant strains of *M. marinum*, and the *espK* and

323 *espL* gene expression levels were measured by qRT-PCR. Gene expression levels were  
324 compared to those of the wild-type strain E11. Values represent mean  $\pm$  standard error of the  
325 mean of two biological replicates. (B) Introduction of PE35/PPE68\_1 results in increased  
326 EsxA secretion but not in gene regulation. Pellet (p), cell wall extract (cw), and supernatant  
327 (s) fractions of the wild-type and *eccCb1* mutant strains of *M. marinum* expressing  
328 PE35/PPE68\_1; PE35/PPE68, containing a C-terminal deletion of PPE68\_1; or  
329 PE35/PPE68\_1, containing a 15-amino-acid C-terminal deletion of PE35, were analysed for  
330 the presence of EspE, EsxA and the introduced PE35 by Western blotting. Fractions represent  
331 0.5, 1 or 2 OD units of original culture. In all cases, PE35 contained a C-terminal HA tag. (C)  
332 EspG1, EspI and PE35/PPE68\_1 do not regulate the transcription of selected *esx-1*-associated  
333 genes. EspG1, EspI or PE35/PPE68\_1 were overexpressed in the *M. marinum eccCb1* mutant  
334 strain, and the expression levels of *espK*, *espL*, *esxA*, *pe\_pgrs1* and *eccD1* were measured by  
335 qRT-PCR. Gene expression levels were compared to those of the wild-type strain E11.  
336 Values represent mean  $\pm$  standard error of the mean of at least two biological replicates. (D)  
337 WhiB6 is involved in transcriptional regulation of ESX-1 substrates and associated genes.  
338 The *whib6* gene was overexpressed in the *M. marinum eccCb1* mutant strain, and transcript  
339 levels of *espK*, *espL*, *esxA*, *pe\_pgrs1* and *eccD1* were measured by qRT-PCR. Gene  
340 expression levels were compared to those of the *eccCb1* mutant strain. Values represent mean  
341  $\pm$  standard error of the mean of two biological replicates.

342

### 343 **PE35 and PPE68 play an important role in ESX-1 secretion but** 344 **not in gene regulation**

345 Previously, PE35, which is located within the *esx-1* gene cluster, has been implicated  
346 in the regulation of *esxA/esxB* gene expression in *M. tuberculosis* [34]. In contrast to this  
347 proposed function, the PE35/PPE68\_1 protein pair in *M. marinum* is secreted via ESX-1

348 [35,36]. To determine whether PE35 plays a role in the regulation of ESX-1 substrates, we  
349 overexpressed the *pe35/ppe68\_1* operon in *M. marinum*. Interestingly, although there was no  
350 effect on gene transcription (Figure 5C), we noticed a substantial increase in EsxA secretion  
351 in the wild-type strain (Figure 5B). This increased EsxA secretion does not seem to represent  
352 a general increase in ESX-1 secretion, as protein levels of the cell-surface-localized EspE  
353 remained similar (Figure 5B). To study this effect in more detail, we introduced PE35 with a  
354 truncated version of PPE68\_1 that contained only the PPE domain and was devoid of the C-  
355 terminal portion. Although the introduced PE35 protein was expressed and secreted  
356 efficiently by ESX-1 (Figure 5B), the levels of secreted EsxA were not increased, indicating  
357 that the C-terminal portion of PPE68\_1 plays a role in EsxA secretion. To determine whether  
358 secretion of the PE35/PPE68\_1 protein pair itself was important for this process, we also  
359 determined the effect of removal of the last 15 amino acids of the PE protein, which  
360 contained the general secretion signal. This small deletion not only abolished the secretion of  
361 the introduced PE35 protein but also abolished EsxA secretion completely, despite the  
362 presence of an intact chromosomal copy of the *pe35/ppe68\_1* operon (Figure 5B). This result  
363 suggests that the truncated form of PE35 somehow interferes with EsxA secretion. Together  
364 these data show that, although PE35 and PPE68\_1 do not seem to regulate the transcription of  
365 genes encoding ESX-1 substrates, these proteins have a strong effect on EsxA, as previously  
366 observed [34].

367

## 368 **Increasing EspI and EspG<sub>1</sub> levels does not lead to altered *esx-1*** 369 **gene expression**

370 A second candidate protein that might regulate gene expression levels of ESX-1  
371 substrates is EspI. The gene encoding this *esx-1*-secretion-associated protein of unknown  
372 function is located within the *esx-1* region and is down-regulated in *esx-1* mutants of both *M.*



373 *marinum* and *M. tuberculosis* (Figure 2). In contrast to the other Esp proteins, EspI contains a  
374 putative nucleotide-binding domain. However, when we overexpressed this protein, we did  
375 not observe a change in the down-regulation of *esx-I*-associated gene transcription in the *M.*  
376 *marinum eccCb<sub>1</sub>* transposon mutant, suggesting that EspI does not regulate this process  
377 (Figure 5C). We next focused on EspG<sub>1</sub> as a candidate *esx-I* gene regulator. EspG<sub>1</sub>, which is  
378 a cytosolic protein that is not part of the membrane-bound secretion machinery, has recently  
379 been shown to interact specifically with PE35/PPE68\_1 in *M. marinum* [35]. It is conceivable  
380 that EspG<sub>1</sub> might function as a sensor that measures protein levels of intracellular ESX-1  
381 substrates. When substrate levels are low, unbound EspG<sub>1</sub> may act as a signal for the  
382 induction of gene expression. In the absence of a functional ESX-1 system, accumulated  
383 PE35/PPE68\_1 or other substrates may bind to EspG<sub>1</sub>, leading to reduced transcription of  
384 *esx-I*-associated genes. To investigate the effect of EspG<sub>1</sub> on *esx-I*-associated gene  
385 expression and protein levels, we increased EspG<sub>1</sub> levels by overexpressing the *espG<sub>1</sub>* gene in  
386 wild-type and ESX-1-deficient *M. marinum*. This overexpression did not result in altered  
387 gene transcription (Figure 5C) or ESX-1 protein secretion (data not shown). Together, our  
388 data show that EspI and EspG<sub>1</sub> do not appear to play key roles in *esx-I*-associated gene  
389 regulation.

390

## 391 **WhiB6 plays a role in the transcription of ESX-1 substrates**

392 In addition to *espI*, another gene encoding a putative regulatory protein was down-  
393 regulated in *esx-I* mutant strains of both *M. marinum* and *M. tuberculosis*, namely, *whiB6*  
394 (Figure 2). WhiB proteins are actinobacteria-specific regulators that contain iron-sulfur  
395 clusters and are thought to act as redox-sensing transcription factors that can cause both gene  
396 activation and repression [37]. WhiB6 was suggested to be involved in the regulation of  
397 EsxA secretion [38], and subsequent studies have confirmed this suggestion [39-41]. To

398 determine whether WhiB6 had an effect on the expression levels of *esx-1* associated genes,  
399 we overexpressed this protein in the ESX-1-deficient *M. marinum eccCb<sub>1</sub>* transposon mutant  
400 strain. We found that particularly those genes that were already down-regulated in the mutant  
401 strain, such as *esxA* and *espK*, showed even further transcriptional inhibition when *whib6*  
402 levels were increased (Figure 5D). Furthermore, expression of *eccD1* was unaltered by *whib6*  
403 overexpression, indicating that *whib6* is involved in the transcription of ESX-1 substrates and  
404 associated genes but not of the components of the ESX-1 system. Surprisingly, *whiB6* is one  
405 of the genes that is down-regulated upon abrogation of ESX-1-mediated protein secretion.  
406 WhiB6 may be activated when the ESX-1 machinery is blocked and represses genes  
407 encoding ESX-1 substrates as well as its own gene. Together, our data suggests that ESX-1  
408 regulation is even more complex than previously thought.

409

## 410 **WhiB6 is required for the regulation of the ESX-1 system**

411 To determine whether WhiB6 is required for ESX-1 regulation, we constructed a deletion  
412 mutant of *whiB6* both in the *M. marinum* WT strain and in the *esx-1* mutant background (*M.*  
413 *marinum M<sup>USA</sup> -ΔwhiB6* and *M. marinum M<sup>VU</sup> -ΔwhiB6*). First, we analyzed the effect of  
414 this mutation on all genes, except for the genes of the *esx-1* locus. This analysis identified 34  
415 genes ( $p < 0.05$ ) that were significantly downregulated in the *esx-1* mutant strains (Figure 6A).  
416 Complementation of both mutants with the *whiB6* gene on a mycobacterial shuttle plasmid  
417 reversed the upregulation of these genes and generally resulted in decreased expression levels  
418 (Figure 6A, B). As expected, several genes that are associated with oxidative stress (*ahpC*,  
419 *ahpD*, *rebU*) were found in the differently expressed gene pool. Also, the enrichment analysis  
420 of the associated Gene Ontology terms for the differently expressed genes (*dnaB*, *dinP*)  
421 reveal that WhiB6 may also regulate DNA replication or repair through regulating DNA-  
422 directed DNA polymerase and DNA helicase (Figure S7). Another noteworthy gene affected

423 by *whiB6* deletion is *iniA*, which is associated with cell wall stress induced by specific  
424 antibiotics. Interestingly, *whiB7* is within the *whiB6*-active gene set, which implies that  
425 WhiB7 is active by, or works with WhiB6. Other than the *whiB6*-active gene set, 13 genes,  
426 which are involved in iron-sulfur cluster binding, cellular lipid metabolic processes are  
427 downregulated.

428

429 **Fig 6. Gene Expression Profiles (Log2 Fold Change) of the Complementary Strains (*M.***  
430 ***marinum* *M*<sup>USA</sup>-Complementary and *M. marinum* *M*<sup>VU</sup>-complementary) and Knock-Out**  
431 **Strains (*M. marinum* *M*<sup>USA</sup> - $\Delta$ *whiB6* and *M. marinum* *M*<sup>VU</sup>- $\Delta$ *whiB6*) Compared with**  
432 **those of the Corresponding Control Strains (*M. marinum* *M*<sup>USA</sup>-Empty Vector Strain**  
433 **and *M. marinum* *M*<sup>VU</sup>-empty vector). The green colour represents up-regulate genes and red**  
434 **colour represents down regulate genes compared with the control strains. The heat map of**  
435 **expression of the *whiB6*-activated gene set is shown in (A); Expression of the *esx-1* locus is**  
436 **shown in (B); and (C) shows the WhiB6-repressed gene set.**

437

438 Remarkably, these genes are almost exclusively downregulated in the *whiB6* *esx-1* double  
439 mutant, reinforcing a functional link between WhiB6 and the ESX-1 system. However, many  
440 of the downregulated genes are encoding hypothetical proteins and hence needed to be  
441 further characterized.

442 Separately, we analyzed the effect of the *whiB6* deletion on all *esx-1* genes. In line  
443 with our previous results, overexpression of *whiB6* in the *esx-1* mutant resulted in  
444 downregulation of many *esx-1* genes (Figure 6C), whereas deletion of *whiB6* did not have a  
445 strong affect in the *esx-1* mutant background. The effect was the opposite for the mutant with  
446 a functional ESX-1 system, there the *whiB6* deletion had a strong positive effect on  
447 transcription of *esx-1* genes. (Figure 6C) and also this effect could be complemented. Only

448 the structural *eccEI* and *mycPI* genes behaved differently. There are six genes that show the  
449 same pattern of up- or down-regulation as most of the *esx-1* genes in the two different *whiB6*  
450 mutants and the complemented strains. Of these six genes, 4 encode putative ESX-1  
451 substrates or ESX-1 chaperones, *i.e.* MMAR\_2894 (PE34-like protein), MMAR0299  
452 (PE\_PGRS1), MMAR5414 ((EspA-like) and MMAR5432 (EspD-like). Together, these  
453 experiments show a strong linkage between WhiB6 and the regulation of different *esx-1*  
454 genes in response to secretion activity.

455

## 456 **Discussion**

457 In this study, we determined the transcriptomes of the *M. marinum* E11 wild-type and  
458 the double-auxotrophic *M. tuberculosis* mc<sup>2</sup>6020 mutant strains and compared these  
459 transcriptomes with those of the corresponding isogenic *esx-1* mutants. We found that during  
460 growth in 7H9 culture medium, genes encoding ESX-1 substrates, such as EsxA and other  
461 ESX-1-associated proteins, were down-regulated in the mutant strains, whereas the  
462 transcription of genes encoding several structural components of the ESX-1 system remained  
463 unaffected. This specific decrease in transcription might function as a mechanism to avoid  
464 toxic accumulation of ESX-1 substrates. Interestingly, a similar decrease in substrate  
465 production has been shown for the ESX-5 secretion system, where the PE\_PGRS substrates  
466 do not accumulate intracellularly when secretion is blocked [42,43]. However, for these  
467 PE\_PGRS substrates, regulation was shown to occur post-transcriptionally [43], implying  
468 that a different mechanism is involved.

469 The most prominent change in gene expression that was observed upon host cell  
470 infection by the *M. marinum* *esx-1* mutant strain was the increase in transcription of the *espA*  
471 operon. The specific and pronounced transcriptional increase in the expression of this operon,  
472 and not of any other *esx-1* associated gene, indicates that transcription of the *espA* operon is

473 regulated independently of the other substrates during infection. Previously, it has been  
474 shown that the *espA* operon is regulated by different transcription and regulation factors,  
475 including EspR, MprAB and PhoPR [20,44,45]. Our new finding also suggests that EspA,  
476 EspC and EspD are vital for the bacteria during the early phase of infection. Since ESX-1 has  
477 been shown to be responsible for mycobacterial escape from the phagosome, which occurs  
478 within the first few hours of infection with *M. marinum* [6], the proteins produced by the  
479 *espA* operon may play an important role in this process. Consequently, the avirulent  
480 phenotype of ESX-1-deficient mycobacteria might be partly attributable to the inability to  
481 secrete EspA and/or EspC early in infection.

482 To determine the mechanism via which ESX-1 substrate regulation is mediated, we  
483 overexpressed proteins that may have a regulatory function. Overexpression of the *esx-1*-  
484 encoded EspI and EspG<sub>1</sub> proteins did not have an effect on the reduced transcription of ESX-  
485 1 substrates in ESX-1-deficient *M. marinum*. The putative regulatory protein WhiB6,  
486 however, did affect the transcription of these genes. While the transcript levels of *whib6* itself  
487 were decreased in *esx-1* mutants of *M. marinum* and *M. tuberculosis*, increasing WhiB6  
488 levels by overexpression resulted in a further decrease in transcription of the ESX-1 substrate  
489 in ESX-1-deficient *M. marinum*. This result clearly indicates that WhiB6 is involved in ESX-  
490 1-associated gene regulation, as previously suggested [41]. Indeed, there is accumulating  
491 evidence that WhiB proteins function as transcription factors that may play a role in survival  
492 within the host (reviewed in [46]). Recently, other groups have also presented evidence  
493 supporting a role for WhiB6 in the regulation of the transcription of *esx-1* genes [39-41].

494 A remarkable finding in this study was that overproduction of PE35/PPE68\_1 resulted  
495 in a large increase in EsxA secretion. Previously, deletion of *M. tuberculosis* PE35 had  
496 already been shown to abolish *esxA* transcription and secretion of the corresponding gene  
497 product [34]. Here, we found that EsxA and PE35 secretion are linked, as an increase in PE35

498 secretion resulted in a concomitant increase in EsxA secretion. The C terminus of PPE68\_1 is  
499 required for this effect, indicating that this is a specific process, which is consistent with the  
500 fact that cell-surface localization of another ESX-1 substrate, namely, EspE, is unaffected by  
501 overproduction of PE35/PPE68\_1. It is possible that the PPE68 proteins serve as chaperones  
502 to escort EsxA outside the bacterium, or these proteins, may be part of the secretion  
503 apparatus, making the secretion of specific substrates highly efficient.

504         During *M. marinum* infection of human macrophages, we found that transcription of  
505 many *pe\_pgrs* and *ppe* family genes was strongly down-regulated when ESX-1 function was  
506 abrogated. As many as 50% of all genes with decreased transcript levels in the *esx-1* mutant  
507 strain belongs to one of these gene families (Table S4). Notably, in the wild-type strain,  
508 transcription of the *pe\_pgrs* and *ppe* genes was decreased during infection in comparison to  
509 the levels observed during growth in 7H9 medium (Table S5). As part of an adaptive  
510 response to the macrophage environment, expression of these cell-wall-localized proteins  
511 may be down-regulated in order to evade immune recognition or to reduce cell permeability  
512 [47]. The fact that in the absence of a functional ESX-1 secretion system these genes are even  
513 further down-regulated suggests that there are functional links or shared transcriptional  
514 pathways between ESX-1 and (some of the) PE\_PGRS and PPE proteins, which are generally  
515 ESX-5 substrates [48].

516         Taken together, our results show that transcription of the *espA* locus plays an  
517 important role in ESX-1 mediated processes during the first hours of infection. Furthermore,  
518 we established a functional link between PE35 and EsxA secretion and provided evidence of  
519 a regulatory role of WhiB6 in the transcription of ESX-1 substrates and associated genes.

520

## 521 **Materials and Methods**

522

## 523 **Bacterial strains and growth conditions**

524 The *esx-1* mutants of the *M. marinum* E11 wild-type strain used in this study contain  
525 transposon insertions in *eccB<sub>1</sub>*, *eccCa<sub>1</sub>*, *eccCb<sub>1</sub>*, *eccD<sub>1</sub>* and *eccE<sub>1</sub>* [49]. For *M. tuberculosis*,  
526 the attenuated double-deletion strains mc<sup>2</sup>6020 and mc<sup>2</sup>6030 of H37Rv were used, with  
527 deletions of *lysA* and *panCD* and of *RD1* and *panCD*, respectively [24,50]. Bacterial strains  
528 were grown with shaking at 30°C (*M. marinum*) or 37°C (*M. tuberculosis*) in Middlebrook  
529 7H9 culture medium supplemented with 10% ADC (albumin-dextrose-catalase, BD  
530 Biosciences) and 0.05% Tween-80. Culture medium containing the auxotrophic *M.*  
531 *tuberculosis* deletion strains was supplemented with 50 µg/ml pantothenic acid and, for  
532 mc<sup>2</sup>6020, 100 µg/ml L-lysine.

533

## 534 **Infection of human macrophages**

535 THP-1 monocytes were cultured at 37°C in 5% CO<sub>2</sub> in RPMI-1640 with GlutaMAX-  
536 1 (Gibco) supplemented with 10% FBS, 100 µg/ml streptomycin and 100 U/ml penicillin.  
537 Cells were seeded at a density of  $3 \times 10^7$  cells per T175 flask and differentiated into  
538 macrophages by 48 hours of incubation with 25 ng/ml PMA (Sigma-Aldrich). Then,  $1.8 \times$   
539  $10^8$  THP-1 cells were infected with *M. marinum* at a multiplicity of infection (MOI) of 20 for  
540 2 hours, after which the cells were washed with PBS to remove extracellular bacteria. After 4  
541 additional hours of infection at 33°C, the THP-1 cells were lysed with 1% Triton X-100.  
542 After a low-speed centrifugation step to remove cellular debris, mycobacteria were pelleted,  
543 after which RNA was extracted as described in the following section.

544

## 545 **Genome sequence**

546 We sequenced the *M. marinum* E11 strain with PacBio RSII single-molecule real-time  
547 (SMRT) sequencing technology [51]. The raw reads were assembled into two pieces (the core  
548 and the plasmid) with HGAP assembler [52] using the default parameters. The sequence was  
549 improved with iCORN2 [53] with three iterations, correcting 20 single base pair errors and  
550 61 insertions and deletions. To transfer the annotation from the current reference, we used  
551 RATT [54] with the PacBio parameter. Gene models around gaps were manually improved  
552 on the new sequence. The updated genome annotation was resubmitted under the same  
553 accession numbers (HG917972 for the *M. marinum* E11 main chromosome genome and  
554 HG917973 for the *M. marinum* E11 pRAW plasmid; complete sequences).

555

## 556 **RNA extraction and qRT-PCR**

557 *M. marinum* and *M. tuberculosis* cultures were pelleted and bead beaten in 1 ml of  
558 TRIzol (Invitrogen) with 0.1-mm zirconia/silica beads (BioSpec Products). After  
559 centrifugation, supernatants were extracted with chloroform, and RNA was precipitated with  
560 isopropanol. RNA pellets were washed with 80% ethanol and dissolved in RNase-free water.  
561 Contaminant DNA was removed by incubation with DNase I (Fermentas). For RT-PCR,  
562 cDNA was generated using a SuperScript VILO cDNA Synthesis Kit (Invitrogen). An  
563 equivalent of 5 ng of RNA was used in the quantitative PCRs. qRT-PCR was performed  
564 using SYBR GreenER (Invitrogen) and a LightCycler 480 (Roche) instrument. Transcript  
565 levels were normalized to the levels of the housekeeping gene *sigA* [55] using  $\Delta\Delta C_t$  analysis.  
566 All primer sequences used for qRT-PCR are listed in Table S8.

567

## 568 **RNA preparation for Illumina sequencing**

569 Total RNA was extracted with TRIzol (Invitrogen) and then purified on RNeasy spin  
570 columns (Qiagen) according to the manufacturer's instructions. RNA integrity (RNA



571 integrity score  $\geq 6.8$ ) and quantity were determined on an Agilent 2100 Bioanalyzer (Agilent;  
572 Palo Alto, CA, USA). As ribosomal RNA constitutes a vast majority of the extracted RNA  
573 population, depletion of these molecules via RiboMinus-based rRNA depletion was  
574 conducted. For mRNA enrichment, Invitrogen's RiboMinus Transcriptome Isolation Kit,  
575 bacteria was used according to manufacturer's instructions. Briefly, 2  $\mu\text{g}$  of total RNA  
576 samples was hybridized with prokaryotic rRNA-sequence-specific 5'-biotin-labelled  
577 oligonucleotide probes to selectively deplete large rRNA molecules from total RNA. Then,  
578 these rRNA-hybridized, biotinylated probes were removed from the sample with streptavidin-  
579 coated magnetic beads. The resulting RNA sample was concentrated using the RiboMinus  
580 concentrate module according to the manufacturer's protocol. The final RiboMinus RNA  
581 sample was subjected to thermal mRNA fragmentation using the Elute, Prime, Fragment Mix  
582 from the Illumina TruSeq RNA Sample Preparation Kit v2 (Low-Throughput protocol). The  
583 fragmented mRNA samples were subjected to cDNA synthesis using the Illumina TruSeq  
584 RNA Sample Preparation Kit (low-throughput protocol) according to the manufacturer's  
585 protocol. Briefly, cDNA was synthesized from enriched and fragmented RNA using  
586 SuperScript III reverse transcriptase (Invitrogen) and the SRA RT primer (Illumina). The  
587 cDNA was further converted into double-stranded DNA using the reagents supplied in the  
588 kit, and the resulting dsDNA was used for library preparation. To this end, cDNA fragments  
589 were end-repaired and phosphorylated, followed by adenylation of 3' ends and adapter  
590 ligation. Twelve cycles of PCR amplification were then performed, and the library was  
591 finally purified with AMPure beads (Beckman Coulter) as per the manufacturer's  
592 instructions. A small aliquot (1  $\mu\text{l}$ ) was analysed on an Invitrogen Qubit and an Agilent  
593 Bioanalyzer. The bar-coded cDNA libraries were pooled at equal concentrations before  
594 sequencing on an Illumina HiSeq2000 using the TruSeq SR Cluster Generation Kit v3 and  
595 TruSeq SBS Kit v3. Data were processed with Illumina Pipeline software v1.82.

596

## 597 **RNA-seq analysis**

598 The Illumina reads were mapped with SMALT  
599 (<http://www.sanger.ac.uk/science/tools/smalt-0>) (default parameters) against the new PacBio  
600 reference. From the read count, which was obtained with bedtools ([56], parameter multicov,  
601 with -D to include duplicates and -q 5 to exclude repetitive mapping reads), we performed a  
602 differential expression analysis with DESeq [57] using default parameters.

603

## 604 **Plasmid construction**

605 The *E. coli*-mycobacterial shuttle vector pSMT3 was used for the construction of all  
606 plasmids. To overexpress PE35-PPE68\_1 (MMARE11\_01740- MMARE11\_01750), we used  
607 a previously described plasmid [13]. For construction of the plasmid containing *espG<sub>I</sub>*, this  
608 gene was amplified from the *M. marinum* E11 genome by PCR using primers containing  
609 NheI and EcoRV restriction sites and a 3' HA epitope. The resulting PCR product and empty  
610 pSMT3 were digested with NheI and EcoRV followed by ligation of *espG<sub>I</sub>* into the vector by  
611 T4 ligase (Fermentas). For construction of the plasmid containing *whib6*, this gene was  
612 amplified from the *M. marinum* E11 genome by PCR using primers containing NheI and  
613 BamHI restriction sites. For the other construct, *espI* was amplified from the *M. marinum*  
614 E11 genome by PCR using primers containing NheI and BglII restriction sites. The PCR  
615 product was digested with NheI and BamHI. Empty pSMT3 was digested with NheI and  
616 BamHI, after which the PCR product was ligated into the vector. All plasmids were  
617 introduced into the *M. marinum* wild-type E11 and isogenic *eccCb<sub>I</sub>* mutant strains by  
618 electroporation. All primer sequences are listed in Table S8.

619

## 620 **Analysis of protein expression and secretion**

621 *M. marinum* cultures were grown to mid-logarithmic phase in 7H9 culture medium  
622 supplemented with 0.2% glycerol and 0.2% dextrose. Bacteria were pelleted, washed in PBS  
623 and incubated in 0.5% Genapol X-080 (Sigma-Aldrich) for 30 minutes to extract cell wall  
624 proteins. Genapol X-080-treated *M. marinum* cells were disrupted by sonication. Secreted  
625 proteins were precipitated from the culture supernatant by 10% trichloroacetic acid (TCA,  
626 Sigma-Aldrich). Proteins were separated according to molecular weight on 15% SDS-PAGE  
627 gels and subsequently transferred to nitrocellulose membranes (Amersham Hybond ECL, GE  
628 Healthcare Life Sciences). Immunostaining was performed with mouse monoclonal  
629 antibodies directed against the HA epitope (HA.11, Covance), EsxA (Hyb76-8), or rabbit  
630 polyclonal sera recognizing EspE [58].

631

## 632 **LC-MS analysis**

633 Peptide preparation from the *M. marinum* E11 and isogenic *esx-1* mutant strains was  
634 performed as previously described [59]. Approximately 100- $\mu$ g protein digests of each  
635 sample were labelled with 4plex iTRAQ reagents (Applied Biosystems). The combined  
636 iTRAQ-labelled samples were fractionated using strong cation exchange chromatography.  
637 The eluted fractions were dried and desalted using a Sep-Pak C-18 SPE cartridge (Waters,  
638 Milford, MA, USA). LC-MS analysis as well as MS data processing was carried out  
639 following our published procedure [60]. Briefly, each fraction was analysed three times using  
640 an LTQ-Orbitrap Velos (Thermo Scientific). The MS spectra were recorded in the Orbitrap,  
641 whereas the MS2 spectra were recorded in the c-TRAP for HCD fragmentation and in the  
642 LTQ for the CID fragmentation. Both HCD and CID spectra were extracted separately using  
643 Proteome Discoverer software and processed by an in-house script before a Mascot search  
644 against the *M. marinum* E11 proteome. The Mascot results (.dat file) were processed by

645 Scaffold software for validation of protein identification and quantitative assessment. For  
646 protein identification, local false positive rates (FDR) were maintained below 1% for both  
647 protein and peptide identification (0.91% and 0.9% for peptides and proteins, respectively,  
648 for this dataset). Protein quantitation was processed using Scaffold Q+, which is based on the  
649 i-Tracker algorithm [61]. The iTRAQ quantitation using HCD is highly accurate, and a  
650 change of more than 2-fold was considered significant differential expression in this study.

651

## 652 **Accession codes**

653 Sequencing reads have been submitted to the EMBL-EBI European Nucleotide Archive  
654 (ENA) Sequence Read Archive (SRA) under the study accession no. PRJEB8560.

655

## 656 **Acknowledgements**

657 We thank Astrid van der Sar and Esther Stoop for providing the *M. marinum* *E11* ESX-1  
658 mutants. Work in AP's laboratory is supported by the KAUST faculty baseline fund  
659 (BAS/1/1020-01-01). The authors thank members of the Bioscience Core Lab (BCL) at  
660 KAUST for sequencing the RNA-seq libraries on the Illumina HiSeq platform and for  
661 running protein samples through the quantitative proteomics workflow with the LTQ-  
662 Orbitrap Velos instrument (Thermo Scientific).

663

## 664 **References**

- 665 1. Lewis KN, Liao R, Guinn KM, Hickey MJ, Smith S, Behr MA, et al. Deletion of RD1  
666 from *Mycobacterium tuberculosis* mimics bacille Calmette-Guerin attenuation. *J*  
667 *Infect Dis.* 2003;187: 117-123.

- 668 2. Pym AS, Brodin P, Brosch R, Huerre M, Cole ST. Loss of RD1 contributed to the  
669 attenuation of the live tuberculosis vaccines *Mycobacterium bovis* BCG and  
670 *Mycobacterium microti*. *Mol Microbiol.* 2002;46: 709-717.
- 671 3. Stamm LM, Morisaki JH, Gao LY, Jeng RL, McDonald KL, Roth R, et al.  
672 *Mycobacterium marinum* escapes from phagosomes and is propelled by actin-based  
673 motility. *J Exp Med.* 2003;198: 1361-1368.
- 674 4. van der Wel N, Hava D, Houben D, Fluitsma D, van Zon M, Pierson J, et al. *M.*  
675 *tuberculosis* and *M. leprae* translocate from the phagolysosome to the cytosol in  
676 myeloid cells. *Cell.* 2007;129: 1287-1298.
- 677 5. de Jonge MI, Pehau-Arnaudet G, Fretz MM, Romain F, Bottai D, Brodin P, et al.  
678 ESAT-6 from *Mycobacterium tuberculosis* dissociates from its putative chaperone  
679 CFP-10 under acidic conditions and exhibits membrane-lysing activity. *J Bacteriol.*  
680 2007;189: 6028-6034.
- 681 6. Houben D, Demangel C, van Ingen J, Perez J, Baldeon L, Abdallah AM, et al. ESX-1-  
682 mediated translocation to the cytosol controls virulence of mycobacteria. *Cell*  
683 *Microbiol.* 2012;14: 1287-1298.
- 684 7. De Leon J, Jiang G, Ma Y, Rubin E, Fortune S, Sun J. *Mycobacterium tuberculosis*  
685 ESAT-6 exhibits a unique membrane-interacting activity that is not found in its  
686 ortholog from non-pathogenic *Mycobacterium smegmatis*. *J Biol Chem.* 2012;287:  
687 44184-44191.
- 688 8. Coros A, Callahan B, Battaglioli E, Derbyshire KM. The specialized secretory  
689 apparatus ESX-1 is essential for DNA transfer in *Mycobacterium smegmatis*. *Mol*  
690 *Microbiol.* 2008;69: 794-808.

- 691 9. Gao LY, Guo S, McLaughlin B, Morisaki H, Engel JN, Brown EJ. A mycobacterial  
692 virulence gene cluster extending RD1 is required for cytolysis, bacterial spreading and  
693 ESAT-6 secretion. *Mol Microbiol.* 2004;53: 1677-1693.
- 694 10. Fortune SM, Jaeger A, Sarracino DA, Chase MR, Sasseti CM, Sherman DR, et al.  
695 Mutually dependent secretion of proteins required for mycobacterial virulence. *Proc*  
696 *Natl Acad Sci USA.* 2005;102: 10676-10681.
- 697 11. MacGurn JA, Raghavan S, Stanley SA, Cox JS. A non-RD1 gene cluster is required  
698 for Snm secretion in *Mycobacterium tuberculosis*. *Mol Microbiol.* 2005;57: 1653-  
699 1663.
- 700 12. Pallen MJ. The ESAT-6/WXG100 superfamily -- and a new Gram-positive secretion  
701 system? *Trends Microbiol.* 2002;10: 209-212.
- 702 13. Daleke MH, Ummels R, Bawono P, Heringa J, Vandenbroucke-Grauls CM, Luirink J,  
703 et al. General secretion signal for the mycobacterial type VII secretion pathway. *Proc*  
704 *Natl Acad Sci USA.* 2012;109: 11342-11347.
- 705 14. McLaughlin B, Chon JS, MacGurn JA, Carlsson F, Cheng TL, Cox JS, et al. A  
706 mycobacterium ESX-1-secreted virulence factor with unique requirements for export.  
707 *PLoS Pathog.* 2007;3: e105.
- 708 15. Tan T, Lee WL, Alexander DC, Grinstein S, Liu J. The ESAT-6/CFP-10 secretion  
709 system of *Mycobacterium marinum* modulates phagosome maturation. *Cell*  
710 *Microbiol.* 2006;8: 1417-1429.
- 711 16. Asensio JA, Arbues A, Perez E, Gicquel B, Martin C. Live tuberculosis vaccines  
712 based on *phoP* mutants: a step towards clinical trials. *Expert Opin Biol Ther.* 2008;8:  
713 201-211.

- 714 17. Walters SB, Dubnau E, Kolesnikova I, Laval F, Daffe M, Smith I. The  
715 *Mycobacterium tuberculosis* PhoPR two-component system regulates genes essential  
716 for virulence and complex lipid biosynthesis. *Mol Microbiol.* 2006;60: 312-330.
- 717 18. Abramovitch RB, Rohde KH, Hsu FF, Russell DG. *aprABC*: a *Mycobacterium*  
718 *tuberculosis* complex-specific locus that modulates pH-driven adaptation to the  
719 macrophage phagosome. *Mol Microbiol.* 2011;80: 678-694.
- 720 19. Gordon BRG, Li YF, Wang LR, Sintsova A, van Bakel H, Tian SH, et al. *Lsr2* is a  
721 nucleoid-associated protein that targets AT-rich sequences and virulence genes in  
722 *Mycobacterium tuberculosis* (vol 107, pg 5154, 2010). *Proc Natl Acad Sci USA.*  
723 2010;107: 18741-18741.
- 724 20. Pang XH, Samten B, Cao GX, Wang XS, Tvinnereim AR, Chen XL, et al. *MprAB*  
725 regulates the *espA* operon in *mycobacterium tuberculosis* and modulates ESX-1  
726 function and host cytokine response. *J Bacteriol.* 2013;195: 66-75.
- 727 21. Raghavan S, Manzanillo P, Chan K, Dovey C, Cox JS. Secreted transcription factor  
728 controls *Mycobacterium tuberculosis* virulence. *Nature.* 2008;454: 717-721.
- 729 22. Rickman L, Scott C, Hunt DM, Hutchinson T, Menendez MC, Whalan R, et al. A  
730 member of the cAMP receptor protein family of transcription regulators in  
731 *Mycobacterium tuberculosis* is required for virulence in mice and controls  
732 transcription of the *rpfA* gene coding for a resuscitation promoting factor. *Mol*  
733 *Microbiol.* 2005;56: 1274-1286.
- 734 23. Waldbauer JR, Rodrigue S, Coleman ML, Chisholm SW. Transcriptome and  
735 proteome dynamics of a light-dark synchronized bacterial cell cycle. *PLoS One.*  
736 2012;7: e43432.
- 737 24. Sambandamurthy VK, Derrick SC, Jalapathy KV, Chen B, Russell RG, Morris SL, et  
738 al. Long-term protection against tuberculosis following vaccination with a severely

- 739 attenuated double lysine and pantothenate auxotroph of *Mycobacterium tuberculosis*.  
740 *Infect Immun.* 2005;73: 1196-1203.
- 741 25. Joshi SA, Ball DA, Sun MG, Carlsson F, Watkins BY, Aggarwal N, et al. EccA1, a  
742 component of the *Mycobacterium marinum* ESX-1 protein virulence factor secretion  
743 pathway, regulates mycolic acid lipid synthesis. *Chem Biol.* 2012;19: 372-380.
- 744 26. Weston A, Stern RJ, Lee RE, Nassau PM, Monsey D, Martin SL, et al. Biosynthetic  
745 origin of mycobacterial cell wall galactofuranosyl residues. *Tuber Lung Dis.* 1997;78:  
746 123-131.
- 747 27. Pastoret S, Fraipont C, den Blaauwen T, Wolf B, Aarsman ME, Piette A, et al.  
748 Functional analysis of the cell division protein FtsW of *Escherichia coli*. *J Bacteriol.*  
749 2004;186: 8370-8379.
- 750 28. Schmidt KL, Peterson ND, Kustus RJ, Wissel MC, Graham B, Phillips GJ, et al. A  
751 predicted ABC transporter, FtsEX, is needed for cell division in *Escherichia coli*. *J*  
752 *Bacteriol.* 2004;186: 785-793.
- 753 29. McKinney JD, Honer zu Bentrup K, Munoz-Elias EJ, Miczak A, Chen B, Chan WT,  
754 et al. Persistence of *Mycobacterium tuberculosis* in macrophages and mice requires  
755 the glyoxylate shunt enzyme isocitrate lyase. *Nature.* 2000;406: 735-738.
- 756 30. Munoz-Elias EJ, McKinney JD. *Mycobacterium tuberculosis* isocitrate lyases 1 and 2  
757 are jointly required for in vivo growth and virulence. *Nat Med.* 2005;11: 638-644.
- 758 31. Liu KY, Yu JZ, Russell DG. *pckA*-deficient *Mycobacterium bovis* BCG shows  
759 attenuated virulence in mice and in macrophages. *Microbiology-Sgm.* 2003;149:  
760 1829-1835.
- 761 32. Marrero J, Rhee KY, Schnappinger D, Pethe K, Ehrh S. Gluconeogenic carbon flow of  
762 tricarboxylic acid cycle intermediates is critical for *Mycobacterium tuberculosis* to  
763 establish and maintain infection. *Proc Natl Acad Sci USA.* 2010;107: 9819-9824.



- 764 33. Kendall SL, Withers M, Soffair CN, Moreland NJ, Gurcha S, Sidders B, et al. A  
765 highly conserved transcriptional repressor controls a large regulon involved in lipid  
766 degradation in *Mycobacterium smegmatis* and *Mycobacterium tuberculosis*. *Mol*  
767 *Microbiol.* 2007;65: 684-699.
- 768 34. Brodin P, Majlessi L, Marsollier L, de Jonge MI, Bottai D, Demangel C, et al.  
769 Dissection of ESAT-6 system 1 of *Mycobacterium tuberculosis* and impact on  
770 immunogenicity and virulence. *Infect Immun.* 2006;74: 88-98.
- 771 35. Daleke MH, van der Woude AD, Parret AHA, Ummels R, de Groot AM, Watson D,  
772 et al. Specific chaperones for the type VII Protein secretion pathway. *J Biol Chem.*  
773 2012;287: 31939-31947.
- 774 36. Sani M, Houben EN, Geurtsen J, Pierson J, de Punder K, van Zon M, et al. Direct  
775 visualization by cryo-EM of the mycobacterial capsular layer: a labile structure  
776 containing ESX-1-secreted proteins. *PLoS Pathog.* 2010;6: e1000794.
- 777 37. Zheng F, Long Q, Xie J. The function and regulatory network of WhiB and WhiB-  
778 like protein from comparative genomics and systems biology perspectives. *Cell*  
779 *Biochem Biophys.* 2012;63: 103-108.
- 780 38. Das C, Ghosh TS, Mande SS. Computational analysis of the ESX-1 region of  
781 *Mycobacterium tuberculosis*: insights into the mechanism of type VII secretion  
782 system. *PLoS One.* 2011;6: e27980.
- 783 39. Bosserman RE, Nguyen TT, Sanchez KG, Chirakos AE, Ferrell MJ, Thompson CR, et  
784 al. WhiB6 regulation of ESX-1 gene expression is controlled by a negative feedback  
785 loop in *Mycobacterium marinum*. *Proc Natl Acad Sci USA.* 2017;114: E10772-  
786 E10781.

- 787 40. Chen Z, Hu Y, Cumming BM, Lu P, Feng L, Deng J, et al. Mycobacterial WhiB6  
788 differentially regulates ESX-1 and the Dos Regulon to modulate granuloma formation  
789 and virulence in zebrafish. *Cell Rep.* 2016;16: 2512-2524.
- 790 41. Solans L, Aguilo N, Samper S, Pawlik A, Frigui W, Martin C, et al. A specific  
791 polymorphism in mycobacterium tuberculosis H37Rv causes differential ESAT-6  
792 expression and identifies WhiB6 as a novel ESX-1 component. *Infect Immun.*  
793 2014;82: 3446-3456.
- 794 42. Abdallah AM, Verboom T, Weerdenburg EM, van Pittius NCG, Mahasha PW,  
795 Jimenez C, et al. PPE and PE\_PGRS proteins of *Mycobacterium marinum* are  
796 transported via the type VII secretion system ESX-5. *Mol Microbiol.* 2009;73: 329-  
797 340.
- 798 43. Ates LS, Dippenaar A, Ummels R, Piersma SR, van der Woude AD, van der Kuij K,  
799 et al. Mutations in ppe38 block PE\_PGRS secretion and increase virulence of  
800 *Mycobacterium tuberculosis*. *Nat Microbiol.* 2018;3: 181-188.
- 801 44. Cao G, Howard ST, Zhang P, Wang X, Chen XL, Samten B, et al. EspR, a regulator  
802 of the ESX-1 secretion system in *Mycobacterium tuberculosis*, is directly regulated by  
803 the two-component systems MprAB and PhoPR. *Microbiology.* 2015;161: 477-489.
- 804 45. Hunt DM, Sweeney NP, Mori L, Whalan RH, Comas I, Norman L, et al. Long-range  
805 transcriptional control of an operon necessary for virulence-critical ESX-1 secretion  
806 in *Mycobacterium tuberculosis*. *J Bacteriol.* 2012;194: 2307-2320.
- 807 46. den Hengst CD, Buttner MJ. Redox control in actinobacteria. *Biochim Biophys Acta.*  
808 2008;1780: 1201-1216.
- 809 47. Ates LS, van der Woude AD, Bestebroer J, van Stempvoort G, Musters RJ, Garcia-  
810 Vallejo JJ, et al. The ESX-5 system of pathogenic mycobacteria is involved in capsule

- 811 integrity and virulence through its substrate PPE10. *PLoS Pathog.* 2016;12:  
812 e1005696.
- 813 48. Abdallah AM, Verboom T, Weerdenburg EM, van Pittius NCG, Mahasha PW,  
814 Jimenez C, et al. PPE and PE\_PGRS proteins of *Mycobacterium marinum* are  
815 transported via the type VII secretion system ESX-5. *Molecular Microbiology.*  
816 2009;73: 329-340.
- 817 49. van der Sar AM, Abdallah AM, Sparrius M, Reinders E, Vandenbroucke-Grauls  
818 CMJE, Bitter W. *Mycobacterium marinum* strains can be divided into two distinct  
819 types based on genetic diversity and virulence. *Infect Immun.* 2004;72: 6306-6312.
- 820 50. Sambandamurthy VK, Derrick SC, Hsu T, Chen B, Larsen MH, Jalapathy KV, et al.  
821 *Mycobacterium tuberculosis* DeltaRD1 DeltapanCD: a safe and limited replicating  
822 mutant strain that protects immunocompetent and immunocompromised mice against  
823 experimental tuberculosis. *Vaccine.* 2006;24: 6309-6320.
- 824 51. Levene MJ, Korlach J, Turner SW, Foquet M, Craighead HG, Webb WW. Zero-mode  
825 waveguides for single-molecule analysis at high concentrations. *Science.* 2003;299:  
826 682-686.
- 827 52. Chin CS, Alexander DH, Marks P, Klammer AA, Drake J, Heiner C, et al. Nonhybrid,  
828 finished microbial genome assemblies from long-read SMRT sequencing data. *Nature*  
829 *Methods.* 2013;10: 563-+.
- 830 53. Otto TD, Sanders M, Berriman M, Newbold C. Iterative Correction of Reference  
831 Nucleotides (iCORN) using second generation sequencing technology.  
832 *Bioinformatics.* 2010;26: 1704-1707.
- 833 54. Otto TD, Dillon GP, Degraeve WS, Berriman M. RATT: rapid annotation transfer tool.  
834 *Nucleic Acids Res.* 2011;39: e57.

- 835 55. Manganeli R, Dubnau E, Tyagi S, Kramer FR, Smith I. Differential expression of 10  
836 sigma factor genes in *Mycobacterium tuberculosis*. *Mol Microbiol.* 1999;31: 715-724.
- 837 56. Quinlan AR, Hall IM. BEDTools: a flexible suite of utilities for comparing genomic  
838 features. *Bioinformatics.* 2010;26: 841-842.
- 839 57. Anders S, Huber W. Differential expression analysis for sequence count data.  
840 *Genome Biol.* 2010;11: R106.
- 841 58. Carlsson F, Joshi SA, Rangell L, Brown EJ. Polar localization of virulence-related  
842 Esx-1 secretion in mycobacteria. *PLoS Pathog.* 2009;5: e1000285.
- 843 59. Abdallah AM, Hill-Cawthorne GA, Otto TD, Coll F, Guerra-Assuncao JA, Gao G, et  
844 al. Genomic expression catalogue of a global collection of BCG vaccine strains show  
845 evidence for highly diverged metabolic and cell-wall adaptations. *Sci Rep.* 2015;5:  
846 15443.
- 847 60. Zhu J, Zhang HM, Guo TN, Li WY, Li HY, Zhu Y, et al. Quantitative proteomics  
848 reveals differential biological processes in healthy neonatal cord neutrophils and adult  
849 neutrophils. *Proteomics.* 2014;14: 1688-1697.
- 850 61. Shadforth IP, Dunkley TPJ, Lilley KS, Bessant C. i-Tracker: For quantitative  
851 proteomics using iTRAQ (TM). *BMC Genomics.* 2005;6: 145.

852

853

854 **Supplementary table and figure legends**

855

856 **Table S1.**

857 Complete list of genes for which the expression levels changed significantly in the *M.*  
858 *marinum eccCb<sub>1</sub>* transposon mutant compared to the levels in the isogenic wild-type strain  
859 E11 during growth in 7H9 culture medium. P<0.05.

860

861 **Table S2.**

862 Complete list of proteins for which the expression levels changed in *M. marinum eccCb<sub>1</sub>*  
863 transposon mutant compared to the levels in the isogenic wild-type strain E11 during growth  
864 in 7H9 culture medium. Proteins with greater than 2-fold change were considered  
865 significantly differentially expressed.

866

867 **Table S3.**

868 Complete list of genes for which the expression levels changed significantly ( $p < 0.05$ ) in the  
869 auxotrophic *M. tuberculosis* RD1 deletion mutant strain mc<sup>2</sup>6030 compared to the levels in  
870 the isogenic control strain mc<sup>2</sup>6020 during growth in 7H9 culture medium.

871

872 **Table S4.**

873 Complete list of genes for which the expression levels changed significantly ( $p < 0.05$ ) in the  
874 *M. marinum eccCb<sub>1</sub>* transposon mutant strain compared to the levels in the wild-type strain  
875 E11 during infection of human THP-1 macrophages.

876

877 **Table S5.**

878 Complete list of genes for which the expression levels changed significantly ( $p < 0.05$ ) in the  
879 *M. marinum* wild-type strain during infection of macrophages compared to the levels during  
880 growth in 7H9 culture medium.

881

882 **Table S6.**

883 Complete list of genes for which expression levels changed significantly ( $p < 0.05$ ) in the *M.*  
884 *marinum eccCb<sub>1</sub>* transposon mutant strain during infection of macrophages compared to the  
885 levels in the wild-type strain E11 during growth in 7H9 culture medium.

886

887 **Table S7.**

888 Complete list of genes for which the expression levels changed significantly ( $p < 0.05$ ) in the  
889 *M. marinum* *eccCb1* transposon mutant strain during infection of macrophages compared to  
890 the levels during growth in 7H9 culture medium.

891

892 **Table S8.**

893 Primers used in this study. Restriction sites are shown in bold.

894

895 **Figure S1**

896 Euclidean distance matrices of RNA-seq transcriptome data showing clustering of *M.*  
897 *marinum* wild-type (E11) and *eccCb1* transposon mutant (ESX-1) strains grown in culture  
898 medium (three biological replicates) or during infection of THP-1 cells (indicated as 'int').

899

900 **Figure S2**

901 Principal component analysis (PCA) of biological replicates of proteome data showing  
902 clustering of *M. marinum* wild-type (E11) and *eccCb1* transposon mutant (ESX-1) strains.  
903 PCA mapping showed clustering of biological replicates of the E11 wild-type and *esx-1*  
904 mutant strains.

905

906 **Figure S3**

907 Correlation between protein and mRNA expression of the *M. marinum* *eccCb1* transposon  
908 mutant and the isogenic wild-type strain E11 during growth in 7H9 culture medium. (A)  
909 Scatterplot of the relationship between differentially expressed genes quantified in both data  
910 sets. (B-F) Scatterplots for protein and gene transcript expression classified by functional

911 categories. Scatterplots display the rectilinear equation and the Pearson correlation coefficient  
912 ( $R^2$ ).

913

#### 914 **Figure S4**

915 Functional categories of genes that are significantly changed in the transcriptome and  
916 proteome of the *M. marinum eccCb<sub>1</sub>* transposon mutant compared to the isogenic wild-type  
917 strain E11 during growth in 7H9 culture medium. Genes exhibiting differential expression at  
918 the RNA and protein levels were grouped according to the MarinoList classification  
919 (<http://mycobrowser.epfl.ch/marinolist.html>).

920

#### 921 **Figure S5**

922 Most differentially expressed genes of the *M. marinum eccCb<sub>1</sub>* transposon mutant compared  
923 to the isogenic wild-type strain E11 during infection of primary macrophages, grouped into  
924 broad functional categories. Within each group, genes are ranked in ascending order by *P*-  
925 value. (A). Top 100 annotated genes from the *M. marinum E11* strain that were the most  
926 differentially expressed in the *M. marinum* wild-type strain E11 during infection of primary  
927 macrophages. Bar chart of log<sub>2</sub>-fold changes for individual genes (tags, left). (B). Top 100  
928 annotated genes from the *M. marinum E11* strain that were the most differentially expressed  
929 in the *M. marinum eccCb<sub>1</sub>* transposon mutant compared to the isogenic wild-type strain E11  
930 during infection of primary macrophages (tags, left). Bar chart of log<sub>2</sub>-fold changes for  
931 individual genes.

932

#### 933 **Figure S6:**

934 Regulation of genes encoding proteins predicted to be involved in metabolic adaptation,  
935 energy metabolism and transcriptional regulatory processes in the *M. marinum eccCb<sub>1</sub>*

936 transposon mutant grown in 7H9 culture medium as well as in the wild-type and *eccCb<sub>1</sub>*  
937 transposon mutant strains during infection in human THP-1 macrophages (indicated as ‘int’)  
938 compared to the that in the wild-type strain E11 during growth in 7H9 culture medium. (A)  
939 *Catabolism of fatty acids*. Genes were selected based on their annotation and ordered based  
940 on expression. (B) Energy generation and NAD<sup>+</sup> regeneration. Genes were selected based on  
941 their annotation and ordered based on expression. (C) Genes of the *kstR* regulon, which are  
942 required for uptake and metabolism of cholesterol (1, 2). (D) Transcriptional regulation.  
943 Genes were selected based on their annotation and ordered based on expression.

944 **Figure S7**

945 The enriched Gene Ontology (GO) terms of the gene set activated (excluding the *esx-1* locus  
946 genes) or repressed by WhiB6. The molecular function GO terms are in red, while the  
947 biological process terms are in blue.



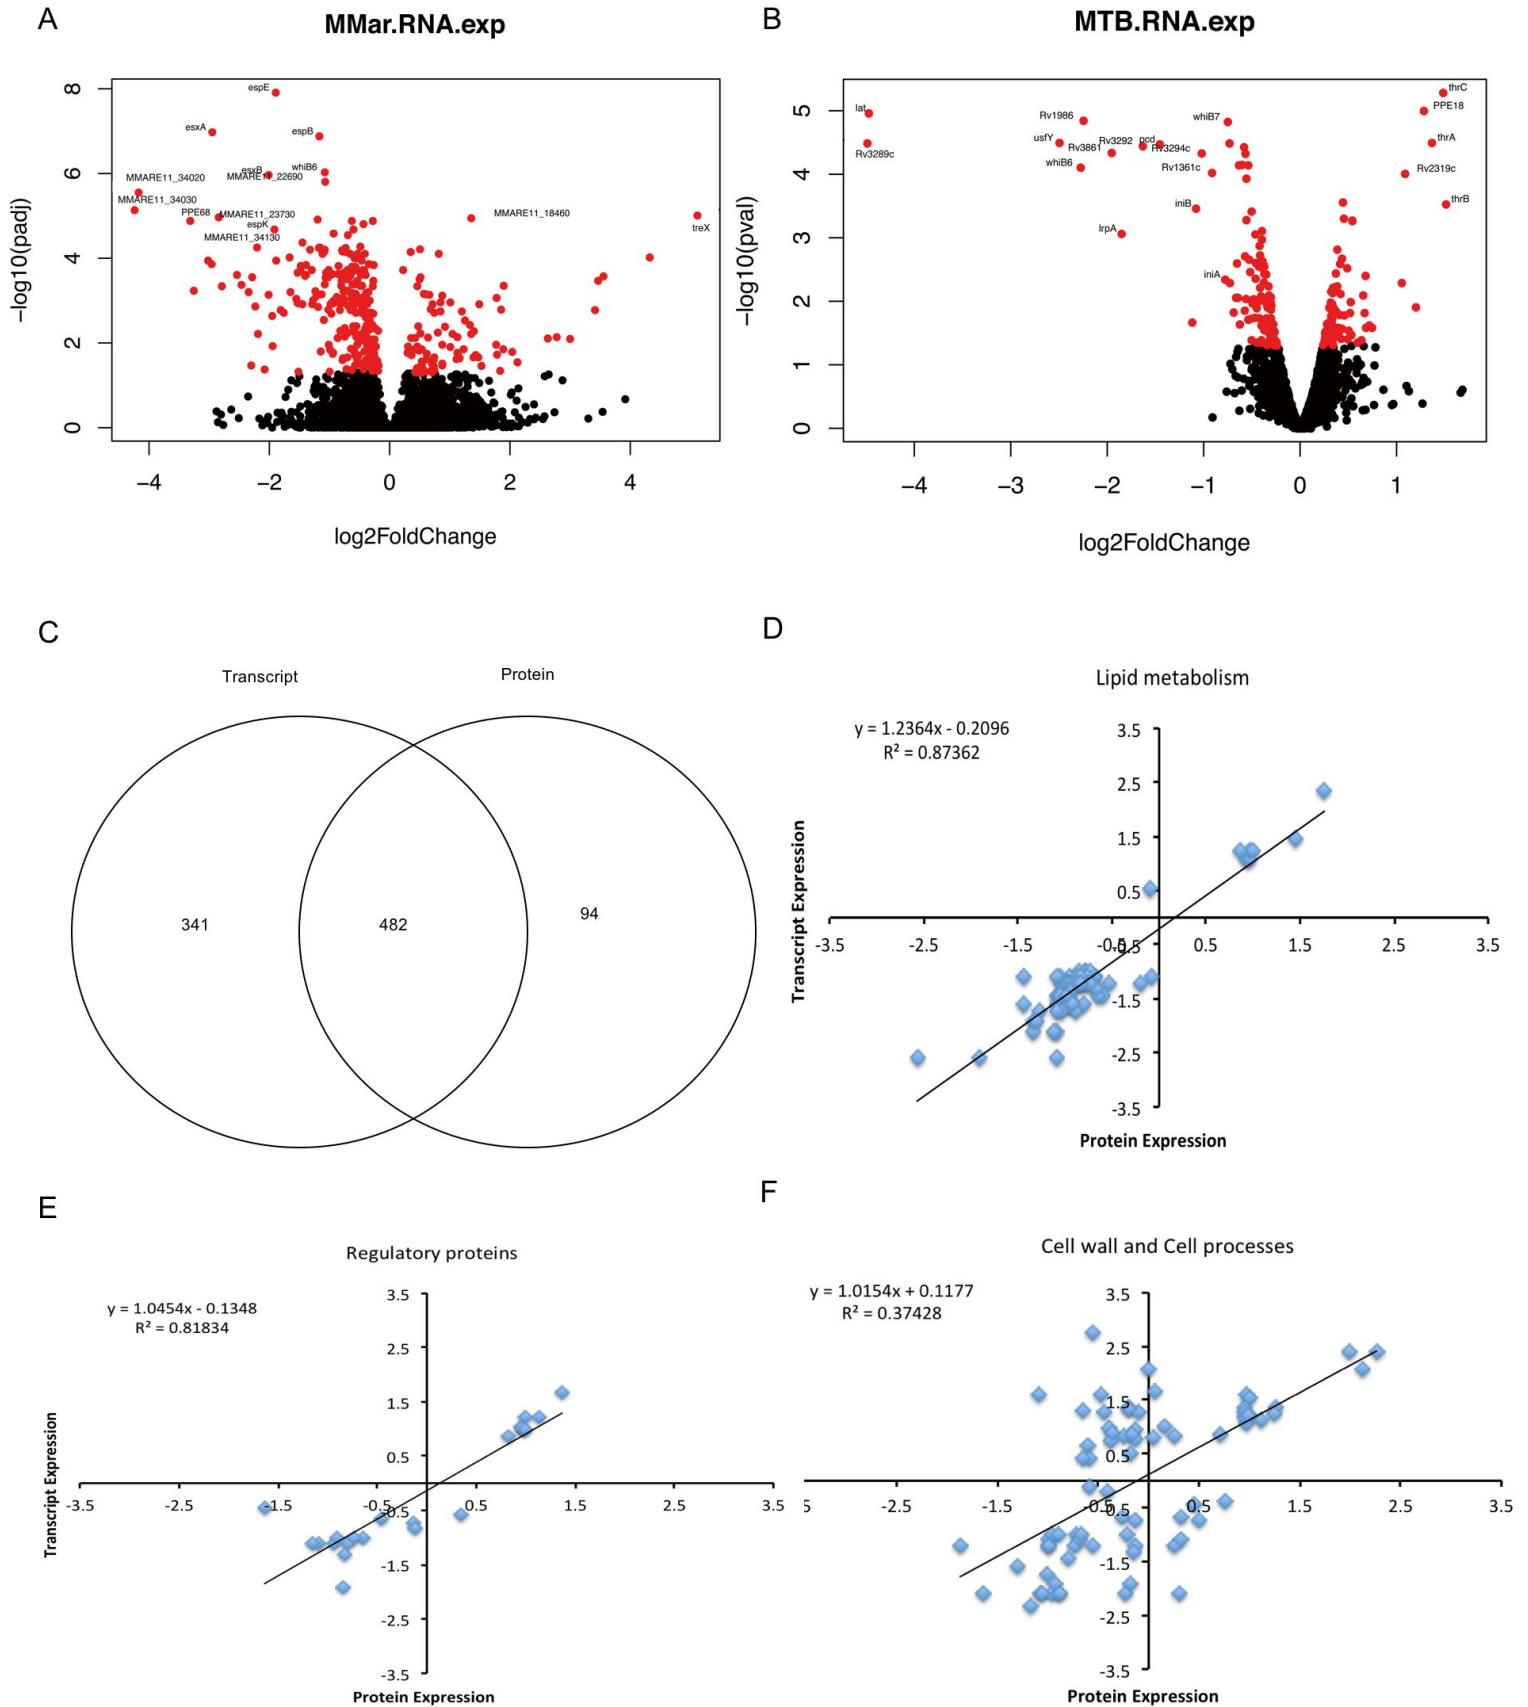

Figure.1

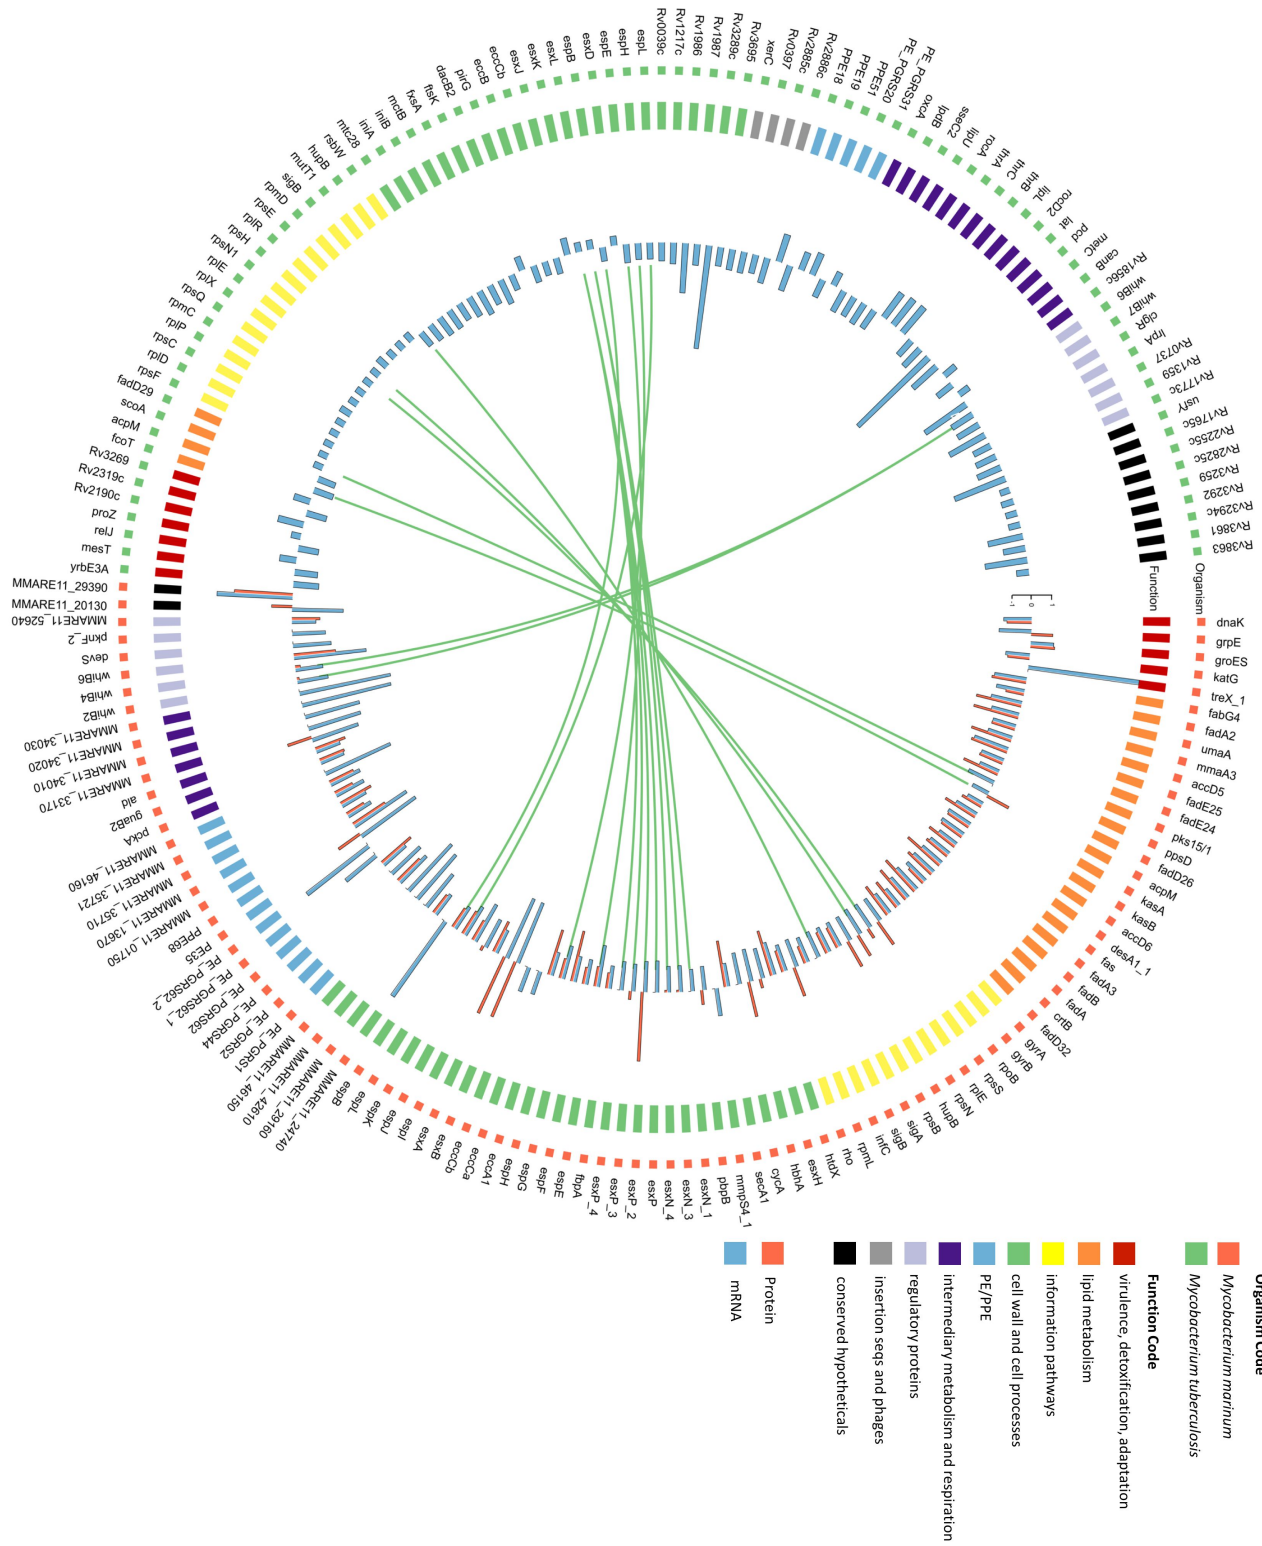

Figure.2

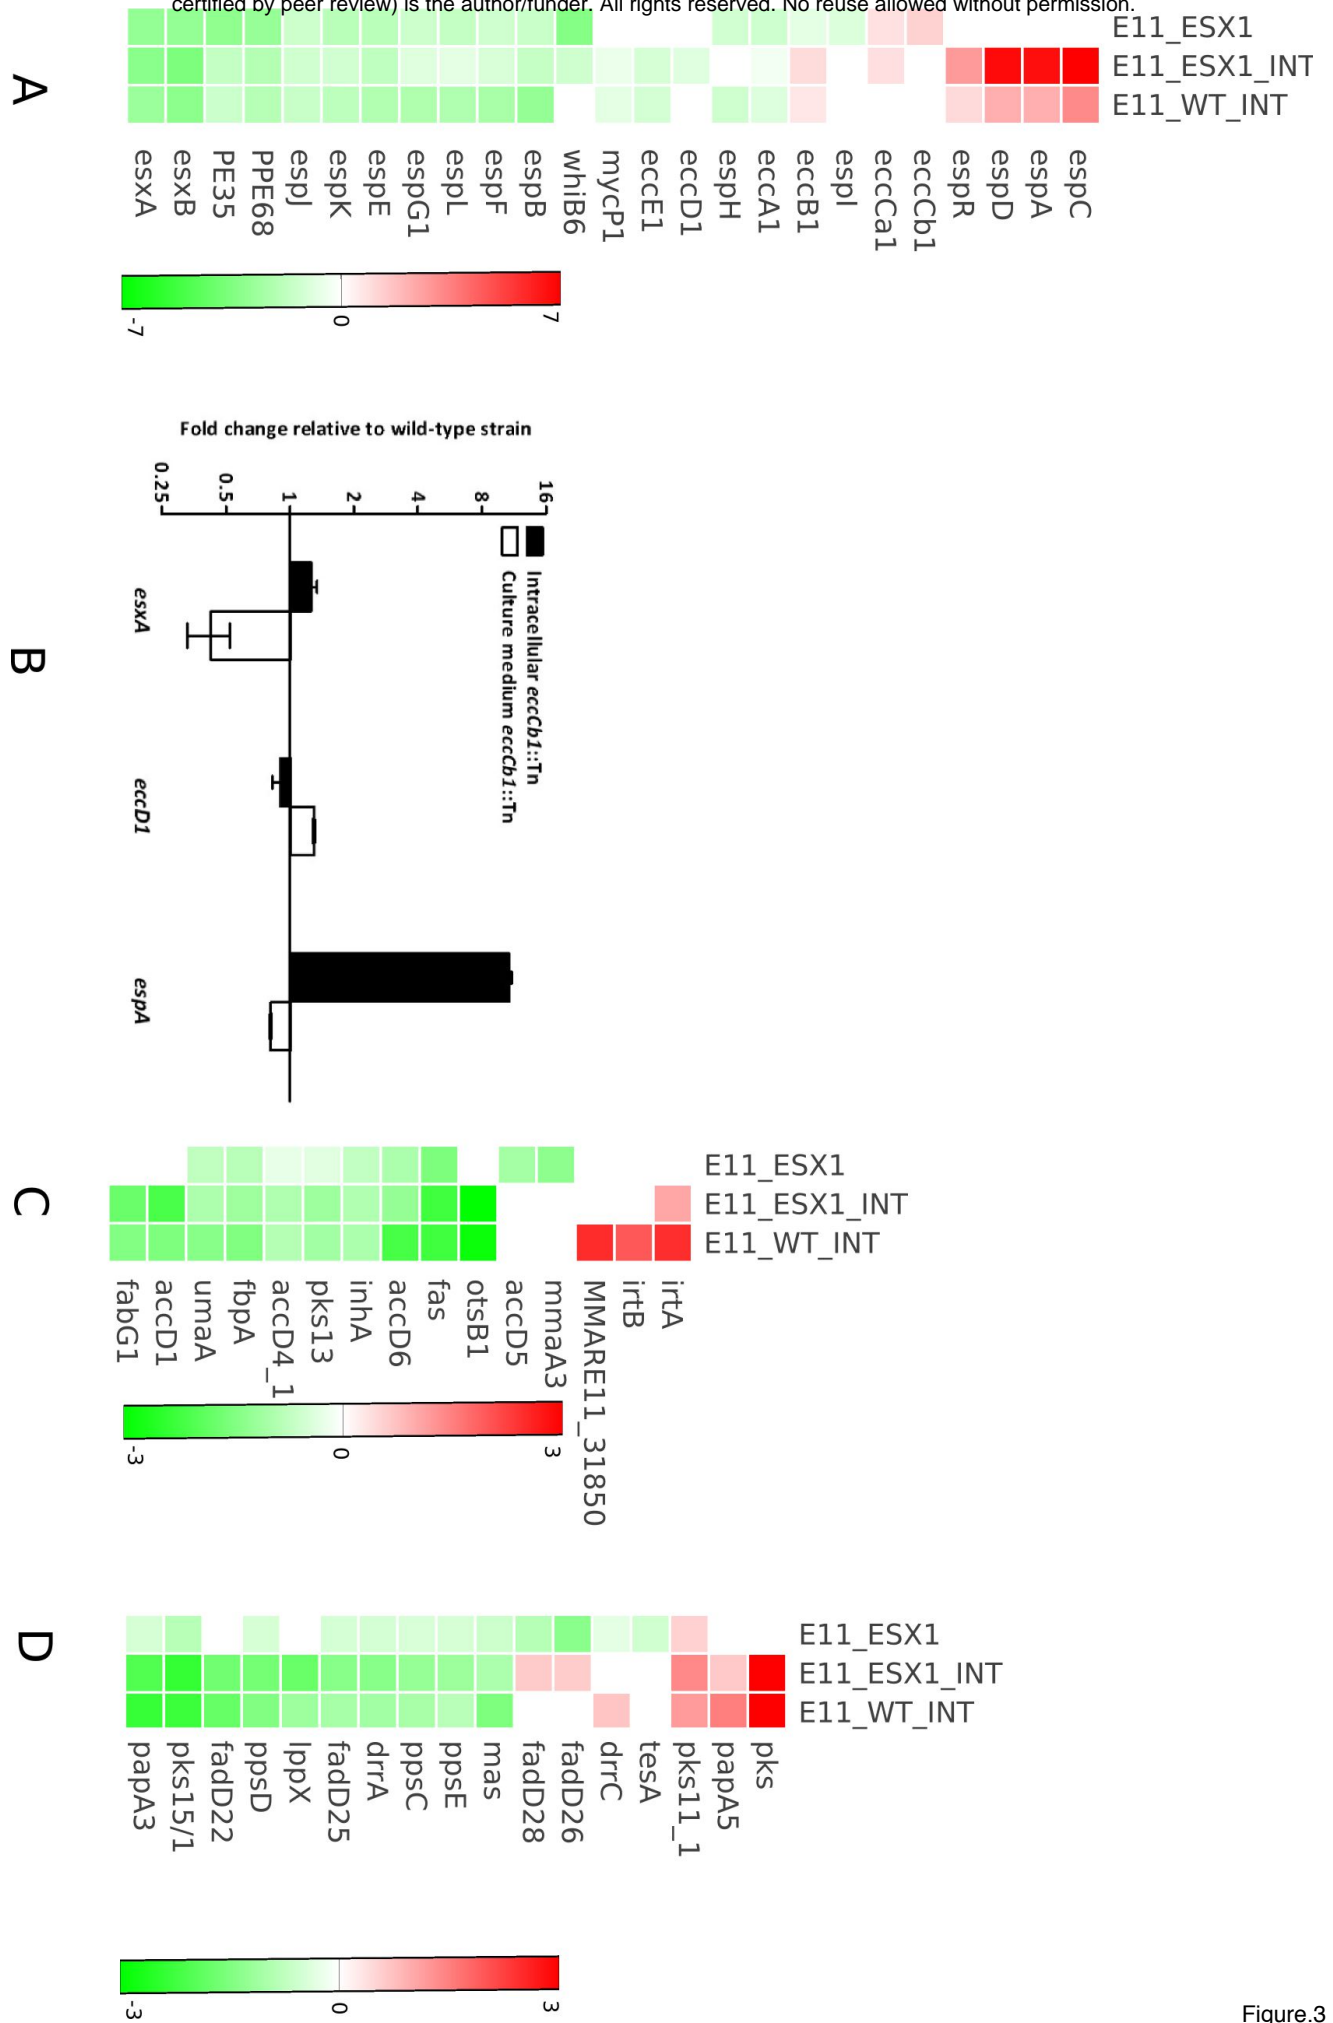

Figure.3

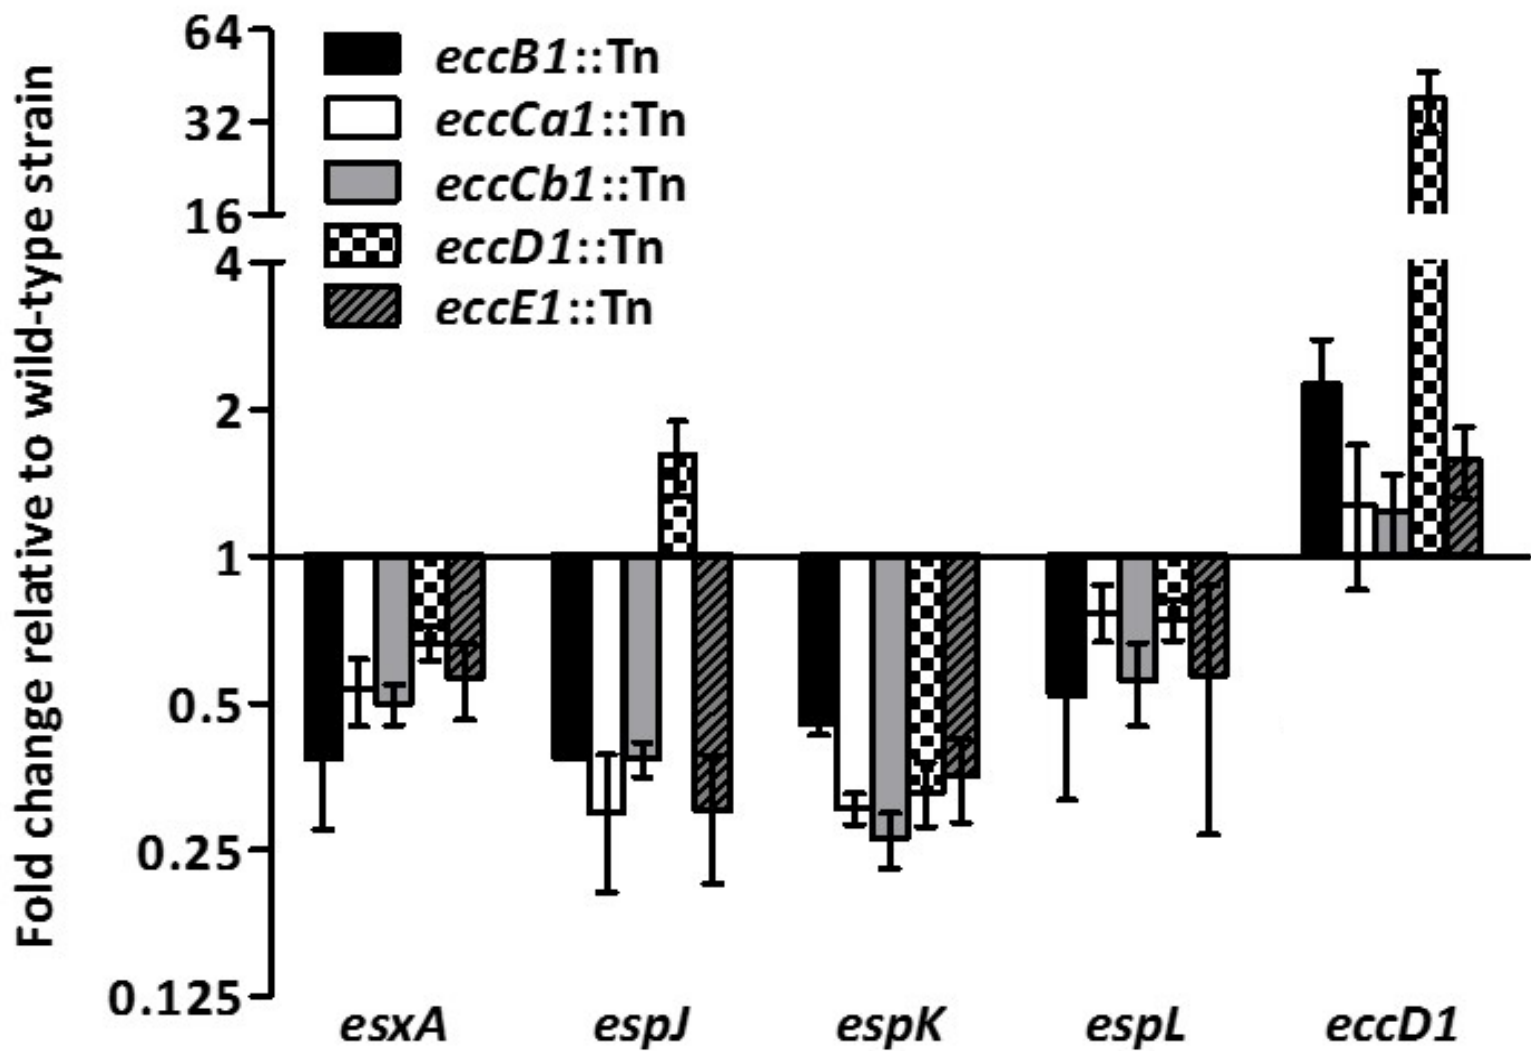

Figure.4

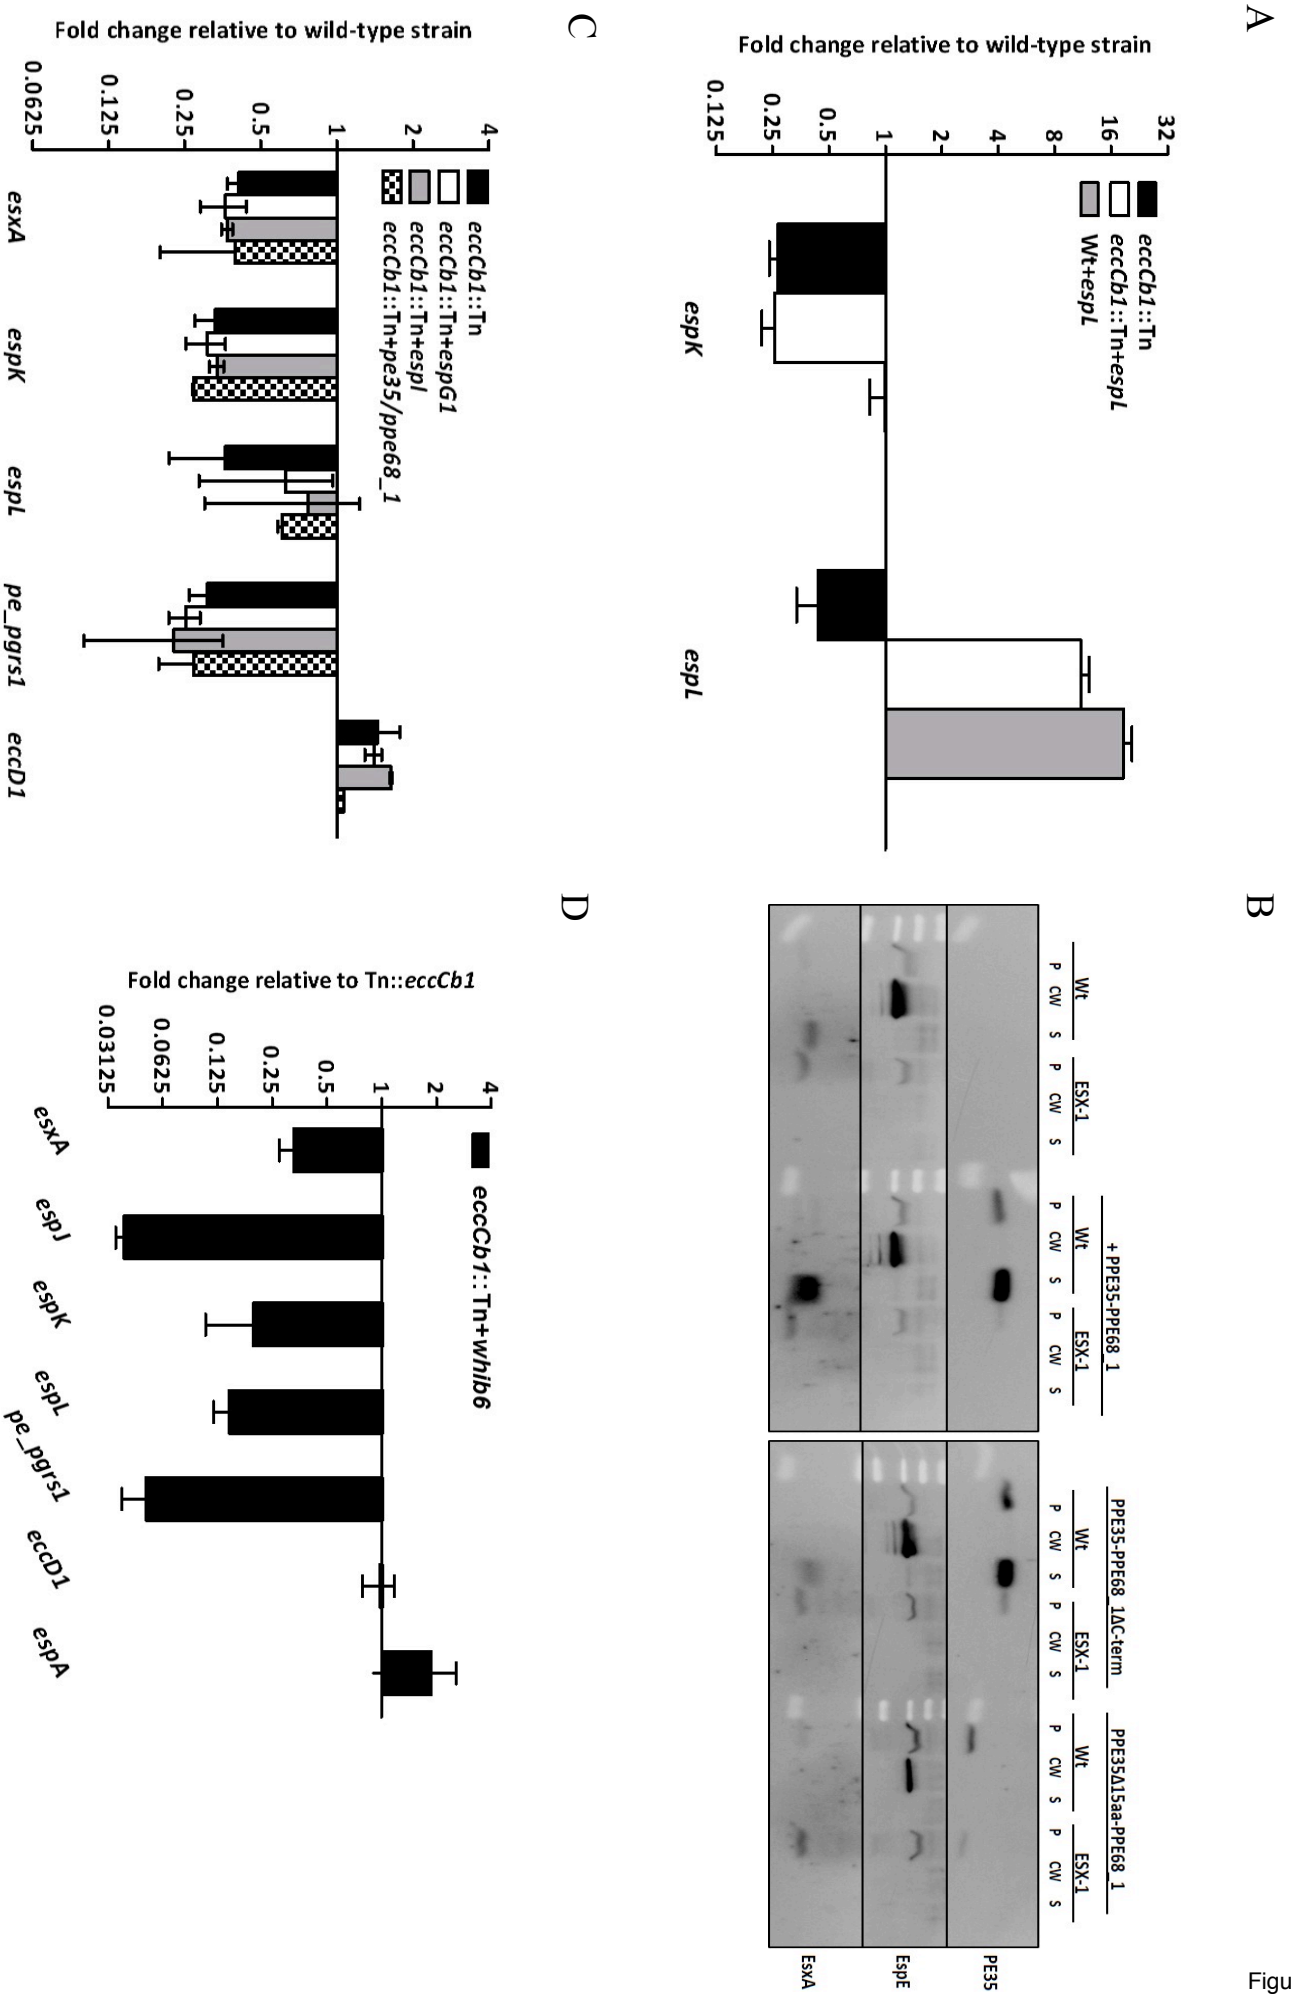

Figure.5

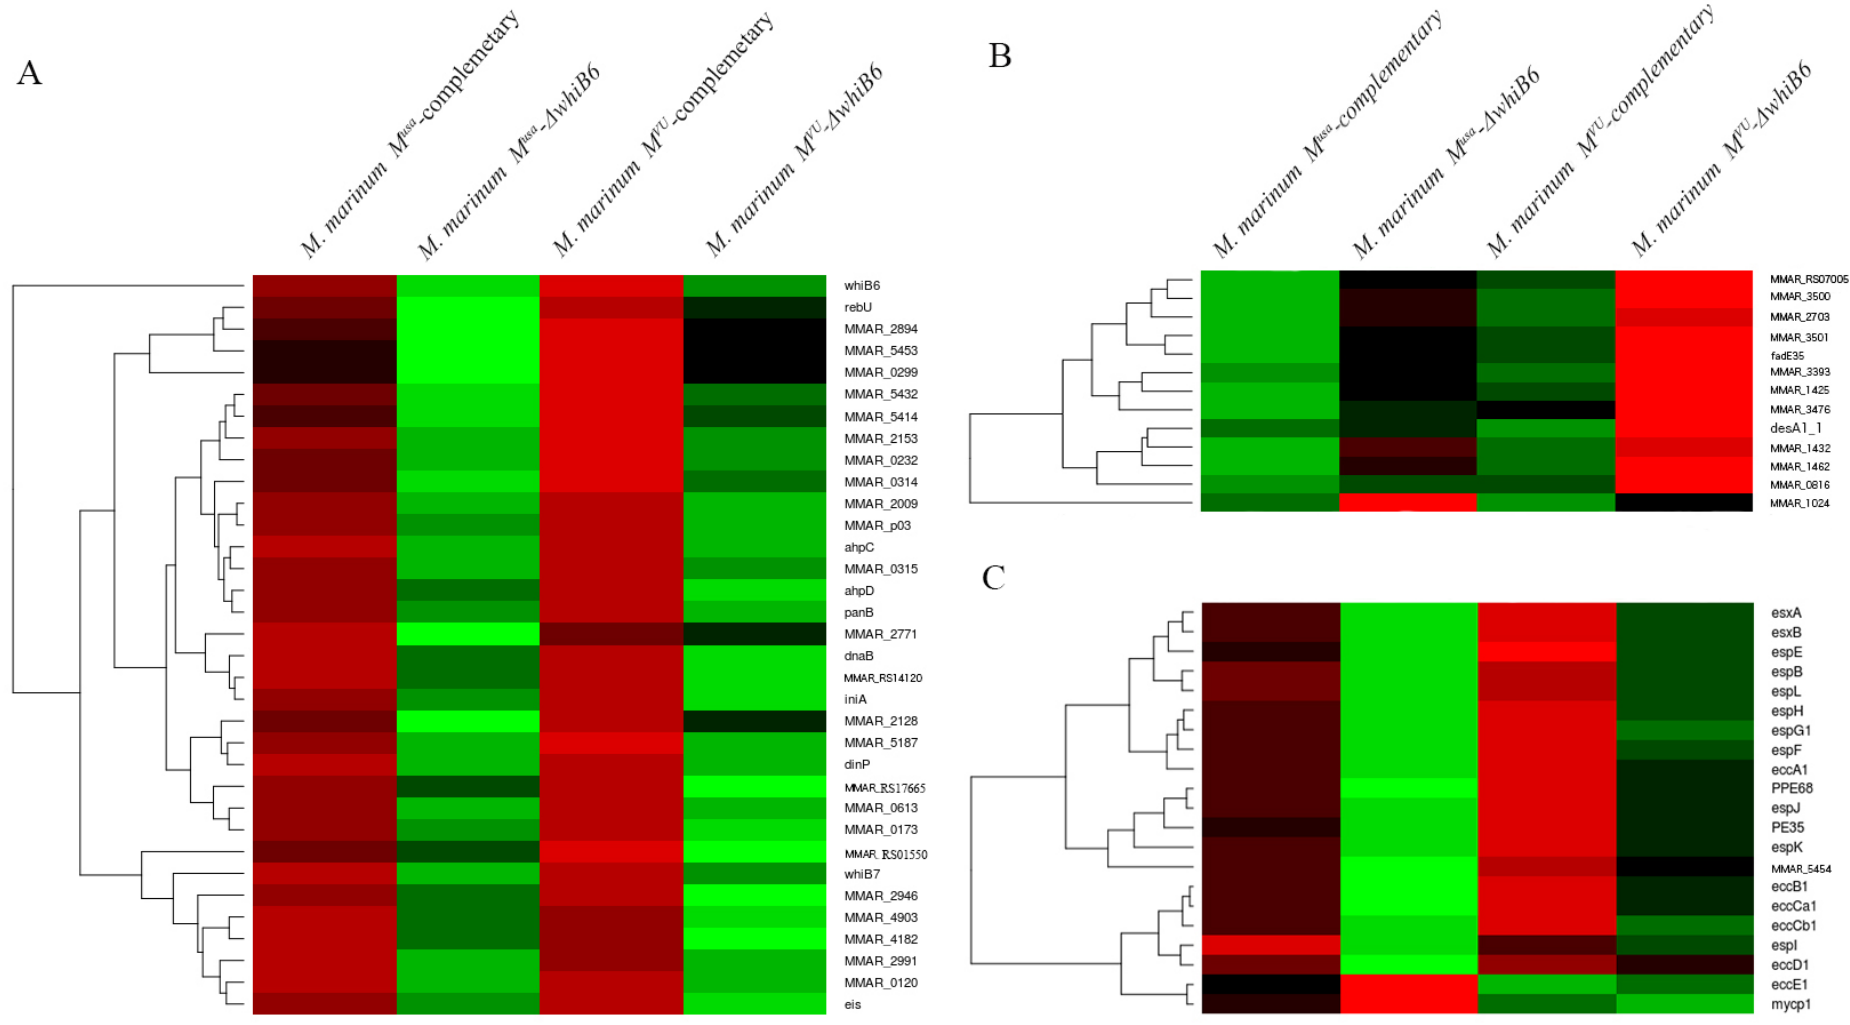

Source: https://www.biorxiv.org/content/10.1101/297440v2.full.pdf
